# Supplementary material
Source: publisher figshare collection journal article supplement (https://gsapubs.figshare.com/articles/dataset/_/12333989)
Supplement: Supplementary file 1 [file 1]

GSA Data Repository Item # 89-04

Title of article The Arabian Continental Alkali Basalt Province: Part I  
Evolution of Harrat Rahat, Kingdom of Saudi Arabia

Author(s) Victor E. Camp and M. John Roobol

see Bulletin v. 101, p. 71 - 95

### Contents

Appendix A (15 pgs.)    Appendix B (1 pg.)

---

---

---

---

---

---

---

---

---

---

APPENDIX A. MAJOR AND TRACE ELEMENT COMPOSITION AND NORMATIVE MINERALOGY FOR 179 SAMPLES FROM HARRAT RAHAT, KINGDOM OF SAUDI ARABIA

Notes:

(1) Ten major elements ( $\text{SiO}_2$ ,  $\text{TiO}_2$ ,  $\text{Al}_2\text{O}_3$ ,  $\text{FeO}$ ,  $\text{MnO}$ ,  $\text{MgO}$ ,  $\text{CaO}$ ,  $\text{Na}_2\text{O}$ ,  $\text{K}_2\text{O}$ , and  $\text{P}_2\text{O}_5$ ) and eleven trace elements (Ni, Cr, Ba, Rb, Sr, Zr, Y, Nb, Ga, Cu, and Zn) were determined by X-ray fluorescence at Washington State University (for accuracy and precision see Hooper and Johnson [1987]). Four trace elements (Sc, V, La, and Ce) were determined by inductively coupled plasma spectrometry (ICP) at King's College, London University, England (for accuracy and precision see Walsh [1980] and Walsh and others [1981]).

(2) Major element data and normative mineralogy are in weight percent, whereas trace element data are in ppm.

(3) The major element analyses are the non-normalized raw data with total iron presented as  $\text{FeO}$ .

(4) Iron was recalculated to a  $\text{Fe}^{2+}/\text{Fe}^{3+}$  ratio of 9:1 and the major element data was then normalized on a volatile-free basis before the CIPW normative mineralogy was calculated.

(5) The data are presented in four parts based on the major stratigraphic units; these are (1) Shawahit-complete data, (2) Hammah-complete data, (3) Madinah-AOB, and (4) Madinah-OTB-hawaiite-mugearite-benmoreite-trachyte. Each of these four data sets are presented in order of decreasing  $\text{SiO}_2$ . The designations of stratigraphic subunits are as shown except for the Lower Shawahit (LS) and the Upper Shawahit (US). Rock type designations are: alkali olivine basalt (AOB), olivine transitional basalt (OTB), hawaiite (HAW), mugearite (MUG), benmoreite (BEN), and trachyte (TRACH). Designation of harrat subdivisions are: Harrat Rashid (R), Harrat Bani Abdullah (BA), Harrat Turrah (T), and Harrat Ar Rukhq (A).

SHAWAHIT-COMplete DATA - Page 1  
(51 samples)

| Sample    | 4229   | 4189  | 4181   | 4180   | 4180   | 4150   | 4201   | 4235   | 4188  | 4191   | 4254   | 4239  | 4241  | 4256  | 4157   |
|-----------|--------|-------|--------|--------|--------|--------|--------|--------|-------|--------|--------|-------|-------|-------|--------|
| Rock Type | OTB    | OTB   | OTB    | OTB    | OTB    | OTB    | OTB    | OTB    | OTB   | OTB    | OTB    | OTB   | OTB   | OTB   | OTB    |
| Harrat    | T      | T     | BA     | BA     | BA     | T      | BA     | T      | T     | T      | A      | T     | T     | T     | BA     |
| Subunit   | LS     | LS    | LS     | LS     | LS     | LS     | LS     | US     | LS    | US     | US     | LS    | US    | US    | LS     |
| SiO2      | 49.69  | 49.53 | 49.20  | 49.03  | 48.94  | 48.91  | 48.88  | 48.80  | 48.76 | 48.75  | 48.72  | 48.71 | 48.71 | 48.65 | 48.64  |
| TiO2      | 1.39   | 1.44  | 1.64   | 1.65   | 1.35   | 1.54   | 1.65   | 1.61   | 1.29  | 1.29   | 1.77   | 1.42  | 1.35  | 1.43  | 1.66   |
| Al2O3     | 16.55  | 15.63 | 16.69  | 15.89  | 16.22  | 15.92  | 16.79  | 16.27  | 16.51 | 15.98  | 16.83  | 15.60 | 15.59 | 15.85 | 16.22  |
| FeO       | 10.24  | 10.84 | 9.96   | 10.14  | 10.74  | 11.38  | 10.85  | 11.20  | 10.38 | 11.32  | 11.03  | 10.90 | 10.38 | 10.25 | 11.13  |
| MnO       | 0.17   | 0.17  | 0.17   | 0.18   | 0.18   | 0.18   | 0.17   | 0.18   | 0.17  | 0.18   | 0.18   | 0.18  | 0.16  | 0.17  | 0.18   |
| MgO       | 7.19   | 9.20  | 8.05   | 10.29  | 9.14   | 9.56   | 7.41   | 8.36   | 8.45  | 9.22   | 7.15   | 10.02 | 9.72  | 9.06  | 8.49   |
| CaO       | 10.85  | 9.47  | 10.65  | 9.50   | 10.71  | 9.95   | 11.37  | 10.74  | 10.54 | 10.60  | 10.60  | 9.35  | 9.58  | 10.46 | 10.84  |
| Na2O      | 3.32   | 2.97  | 3.16   | 3.09   | 3.02   | 2.83   | 2.96   | 3.14   | 2.55  | 2.89   | 3.36   | 2.80  | 2.80  | 3.22  | 3.05   |
| K2O       | 0.55   | 0.53  | 0.68   | 0.79   | 0.35   | 0.55   | 0.32   | 0.43   | 0.27  | 0.37   | 0.45   | 0.57  | 0.48  | 0.63  | 0.31   |
| F2O5      | 0.17   | 0.18  | 0.24   | 0.28   | 0.16   | 0.22   | 0.17   | 0.21   | 0.15  | 0.16   | 0.25   | 0.19  | 0.18  | 0.21  | 0.21   |
| Total     | 100.12 | 99.95 | 100.44 | 100.83 | 100.81 | 101.04 | 100.57 | 100.94 | 99.07 | 100.76 | 100.34 | 99.74 | 98.95 | 99.93 | 100.73 |
| NI        | 106    | 185   | 102    | 224    | 165    | 192    | 107    | 134    | 142   | 239    | 78     | 215   | 210   | 213   | 151    |
| CR        | 228    | 312   | 295    | 396    | 414    | 317    | 239    | 223    | 281   | 367    | 154    | 377   | 391   | 352   | 296    |
| EA        | 113    | 101   | 110    | 132    | 41     | 132    | 54     | 341    | 36    | 77     | 105    | 113   | 96    | 168   | 41     |
| RB        | 7      | 7     | 8      | 8      | 1      | 6      | 2      | 4      | 1     | 5      | 5      | 10    | 6     | 10    | 2      |
| SR        | 316    | 276   | 387    | 406    | 299    | 391    | 288    | 334    | 317   | 288    | 399    | 285   | 568   | 337   | 318    |
| ZR        | 101    | 93    | 142    | 164    | 95     | 101    | 105    | 112    | 95    | 85     | 133    | 103   | 127   | 108   | 109    |
| Y         | 21     | 19    | 24     | 22     | 20     | 20     | 20     | 22     | 20    | 19     | 26     | 18    | 19    | 20    | 21     |
| NB        | 14     | 14    | 17     | 24     | 11     | 17     | 6      | 15     | 6     | 9      | 15     | 15    | 15    | 18    | 8      |
| GA        | 17     | 20    | 18     | 21     | 15     | 20     | 19     | 20     | 17    | 18     | 21     | 22    | 9     | 18    | 21     |
| CU        | 72     | 116   | 72     | 69     | 99     | 108    | 117    | 134    | 127   | 105    | 95     | 109   | 111   | 115   | 124    |
| ZN        | 75     | 80    | 78     | 78     | 75     | 84     | 79     | 87     | 78    | 83     | 86     | 82    | 82    | 80    | 84     |
| SC        | 26     | 25    | 29     | 27     | 30     | 26     | 30     | 25     | 26    | 25     | 31     | 26    | 26    | 24    | 28     |
| V         | 211    | 210   | 226    | 212    | 236    | 208    | 252    | 211    | 207   | 201    | 247    | 207   | 203   | 194   | 235    |
| LA        | 6      | 8     | 8      | 12     | 2      | 8      | 4      | 7      | 4     | 5      | 8      | 8     | 8     | 9     | 3      |
| CE        | 30     | 28    | 33     | 37     | 26     | 31     | 25     | 31     | 25    | 26     | 34     | 30    | 28    | 31    | 26     |
| AN        | 51.35  | 52.48 | 53.47  | 51.61  | 54.25  | 54.87  | 55.77  | 53.79  | 60.32 | 54.71  | 52.72  | 54.44 | 54.65 | 53.36 | 53.89  |
| or        | 3.25   | 3.13  | 4.02   | 4.67   | 2.07   | 3.25   | 1.89   | 2.54   | 1.60  | 2.19   | 2.66   | 3.37  | 2.84  | 3.72  | 1.83   |
| ab        | 27.12  | 25.13 | 25.54  | 25.46  | 25.02  | 23.95  | 25.05  | 24.94  | 21.58 | 24.45  | 26.47  | 23.69 | 23.69 | 23.54 | 25.37  |
| an        | 28.63  | 27.75 | 29.35  | 27.16  | 29.67  | 29.11  | 31.58  | 29.03  | 32.81 | 29.54  | 29.51  | 28.32 | 28.55 | 26.94 | 29.65  |
| ne        | 0.53   | 0.00  | 0.65   | 0.37   | 0.29   | 0.00   | 0.00   | 0.88   | 0.00  | 0.00   | 1.06   | 0.00  | 0.00  | 2.01  | 0.24   |
| di        | 19.76  | 14.74 | 17.88  | 14.74  | 18.30  | 15.32  | 19.48  | 18.73  | 15.10 | 17.97  | 17.62  | 13.69 | 14.48 | 19.22 | 18.61  |
| hy        | 0.00   | 7.90  | 0.00   | 0.00   | 0.00   | 5.06   | 1.03   | 0.00   | 11.70 | 0.58   | 0.00   | 6.17  | 7.31  | 0.00  | 0.00   |
| ol        | 16.26  | 16.53 | 17.83  | 23.15  | 20.92  | 18.31  | 16.39  | 19.59  | 11.94 | 21.51  | 17.43  | 19.73 | 17.54 | 19.76 | 19.71  |
| st        | 1.65   | 1.74  | 1.61   | 1.64   | 1.73   | 1.84   | 1.75   | 1.80   | 1.67  | 1.83   | 1.78   | 1.75  | 1.67  | 1.65  | 1.80   |
| il        | 2.63   | 2.73  | 3.11   | 3.13   | 2.56   | 2.93   | 3.13   | 3.05   | 2.44  | 2.44   | 3.36   | 2.70  | 2.57  | 2.71  | 3.15   |
| ap        | 0.40   | 0.41  | 0.56   | 0.64   | 0.37   | 0.50   | 0.39   | 0.49   | 0.36  | 0.38   | 0.58   | 0.44  | 0.42  | 0.48  | 0.49   |

## SHAWAHIT-COMplete DATA - Page 2

| Sample                         | 4217   | 4266   | 4222  | 4253   | 4153   | 4164   | 4251  | 4255  | 4226   | 4215   | 4269   | 4204   | 4218  | 4095   | 4207  |
|--------------------------------|--------|--------|-------|--------|--------|--------|-------|-------|--------|--------|--------|--------|-------|--------|-------|
| Rock Type                      | OTB    | OTB    | OTB   | OTB    | OTB    | OTB    | OTB   | OTB   | OTB    | OTB    | OTB    | OTB    | OTB   | OTB    | OTB   |
| Harrat                         | T      | A      | T     | A      | BA     | BA     | A     | A     | T      | T      | A      | T      | T     | BA     | T     |
| Subunit                        | us     | us     | us    | us     | us     | LS     | us    | us    | LS     | us     | us     | us     | us    | us     | LS    |
| SiO <sub>2</sub>               | 48.61  | 48.45  | 48.44 | 48.36  | 48.21  | 48.21  | 48.11 | 48.10 | 48.09  | 48.06  | 48.06  | 47.92  | 47.84 | 47.81  | 47.80 |
| TiO <sub>2</sub>               | 1.26   | 1.56   | 1.43  | 1.58   | 1.50   | 1.89   | 1.42  | 1.53  | 1.06   | 1.40   | 1.36   | 1.48   | 1.40  | 1.51   | 1.44  |
| Al <sub>2</sub> O <sub>3</sub> | 15.86  | 17.29  | 16.29 | 16.30  | 16.65  | 16.53  | 15.49 | 16.65 | 16.55  | 15.55  | 15.89  | 15.73  | 15.79 | 15.27  | 16.19 |
| FeO                            | 10.45  | 10.31  | 10.73 | 10.99  | 10.86  | 10.99  | 10.86 | 10.90 | 10.29  | 11.00  | 11.64  | 10.75  | 11.22 | 11.12  | 10.61 |
| MnO                            | 0.17   | 0.17   | 0.17  | 0.18   | 0.18   | 0.17   | 0.17  | 0.17  | 0.17   | 0.17   | 0.18   | 0.17   | 0.17  | 0.18   | 0.18  |
| MgO                            | 9.30   | 7.27   | 8.13  | 8.86   | 8.92   | 8.23   | 9.76  | 6.87  | 9.10   | 9.62   | 9.11   | 9.11   | 9.24  | 9.88   | 8.17  |
| CaO                            | 10.89  | 11.57  | 10.91 | 9.79   | 11.10  | 11.32  | 10.16 | 11.66 | 11.48  | 11.07  | 10.73  | 11.12  | 10.55 | 10.89  | 11.51 |
| Na <sub>2</sub> O              | 2.99   | 3.06   | 3.20  | 3.23   | 2.93   | 2.88   | 3.05  | 3.23  | 2.89   | 2.78   | 2.87   | 3.05   | 2.90  | 2.96   | 3.04  |
| K <sub>2</sub> O               | 0.39   | 0.30   | 0.39  | 0.60   | 0.27   | 0.43   | 0.65  | 0.49  | 0.32   | 0.29   | 0.38   | 0.56   | 0.42  | 0.52   | 0.37  |
| P <sub>2</sub> O <sub>5</sub>  | 0.18   | 0.19   | 0.17  | 0.29   | 0.19   | 0.19   | 0.25  | 0.18  | 0.15   | 0.14   | 0.16   | 0.21   | 0.17  | 0.20   | 0.19  |
| Total                          | 100.11 | 100.18 | 99.86 | 100.19 | 100.80 | 100.84 | 99.92 | 99.78 | 100.10 | 100.09 | 100.38 | 100.11 | 99.71 | 100.34 | 99.49 |
| NI                             | 202    | 106    | 135   | 169    | 177    | 114    | 220   | 84    | 218    | 230    | 200    | 222    | 214   | 241    | 136   |
| CR                             | 420    | 197    | 263   | 262    | 334    | 247    | 349   | 180   | 391    | 458    | 322    | 353    | 375   | 364    | 246   |
| BA                             | 58     | 53     | 88    | 128    | 64     | 39     | 188   | 146   | 65     | 39     | 127    | 98     | 88    | 123    | 70    |
| RB                             | 4      | 3      | 4     | 8      | 1      | 4      | 7     | 5     | 4      | 3      | 4      | 8      | 4     | 5      | 4     |
| SR                             | 287    | 386    | 322   | 352    | 316    | 379    | 414   | 344   | 266    | 281    | 324    | 382    | 324   | 345    | 345   |
| ZR                             | 111    | 110    | 105   | 130    | 107    | 117    | 124   | 109   | 99     | 91     | 91     | 109    | 97    | 103    | 103   |
| Y                              | 20     | 22     | 21    | 25     | 22     | 24     | 20    | 20    | 20     | 19     | 20     | 19     | 19    | 20     | 19    |
| MB                             | 10     | 11     | 13    | 21     | 9      | 12     | 16    | 12    | 7      | 7      | 10     | 19     | 13    | 16     | 12    |
| GA                             | 18     | 21     | 16    | 24     | 20     | 16     | 15    | 19    | 15     | 16     | 16     | 16     | 21    | 20     | 18    |
| CU                             | 109    | 119    | 110   | 108    | 113    | 128    | 94    | 92    | 126    | 104    | 146    | 103    | 123   | 94     | 120   |
| ZN                             | 76     | 77     | 84    | 80     | 80     | 78     | 82    | 81    | 74     | 83     | 83     | 74     | 80    | 84     | 80    |
| SC                             | 29     | 32     | 27    | 26     | 29     | 31     | 23    | 26    | 29     | 29     | 28     | 27     | 28    | 24     | 29    |
| V                              | 229    | 232    | 215   | 202    | 226    | 255    | 194   | 228   | 202    | 233    | 238    | 202    | 213   | 195    | 230   |
| LA                             | 6      | 5      | 5     | 12     | 2      | 6      | 10    | 5     | 4      | 3      | 6      | 8      | 7     | 6      | 6     |
| CE                             | 28     | 28     | 28    | 38     | 29     | 29     | 37    | 32    | 23     | 24     | 29     | 31     | 28    | 28     | 29    |
| AN                             | 54.79  | 57.34  | 54.60 | 52.60  | 57.55  | 57.56  | 54.10 | 57.67 | 59.77  | 56.42  | 56.22  | 57.51  | 55.75 | 57.02  | 57.87 |
| or                             | 2.30   | 1.77   | 2.30  | 3.55   | 1.60   | 2.54   | 3.84  | 2.90  | 1.89   | 1.71   | 2.25   | 3.31   | 2.48  | 3.07   | 2.19  |
| ab                             | 23.69  | 24.22  | 24.06 | 25.42  | 23.22  | 22.79  | 22.61 | 21.64 | 21.03  | 22.48  | 22.86  | 20.37  | 22.88 | 20.24  | 21.44 |
| an                             | 28.70  | 32.56  | 28.94 | 28.21  | 31.48  | 30.91  | 26.66 | 29.49 | 31.24  | 29.10  | 29.35  | 27.58  | 28.83 | 26.85  | 29.44 |
| ne                             | 0.87   | 0.91   | 1.63  | 1.04   | 0.85   | 0.86   | 1.73  | 3.08  | 1.86   | 0.57   | 0.77   | 2.94   | 0.90  | 2.61   | 2.32  |
| di                             | 19.69  | 19.33  | 19.74 | 15.07  | 18.24  | 19.65  | 18.00 | 22.41 | 20.19  | 20.30  | 18.68  | 21.37  | 18.28 | 21.10  | 21.61 |
| ol                             | 20.46  | 16.43  | 18.48 | 21.58  | 20.50  | 18.43  | 22.18 | 15.31 | 20.00  | 21.30  | 21.78  | 19.61  | 21.60 | 21.48  | 17.74 |
| mt                             | 1.68   | 1.67   | 1.73  | 1.77   | 1.75   | 1.77   | 1.75  | 1.75  | 1.65   | 1.77   | 1.87   | 1.73   | 1.81  | 1.80   | 1.71  |
| il                             | 2.40   | 2.96   | 2.72  | 3.01   | 2.84   | 3.58   | 2.69  | 2.91  | 2.01   | 2.66   | 2.58   | 2.81   | 2.66  | 2.87   | 2.73  |
| ap                             | 0.41   | 0.45   | 0.38  | 0.68   | 0.44   | 0.44   | 0.59  | 0.41  | 0.34   | 0.33   | 0.38   | 0.49   | 0.40  | 0.46   | 0.44  |

## SHAWAHIT-COMplete DATA - Page 3

| Sample   | 4151   | 4257  | 2411  | 4149   | 4270  | 4249   | 4224  | 4206  | 4242  | 4203  | 4154  | 4220  | 4262   | 4243  | 4225  |
|----------|--------|-------|-------|--------|-------|--------|-------|-------|-------|-------|-------|-------|--------|-------|-------|
| RockType | OTB    | OTB   | OTB   | OTB    | OTB   | OTB    | OTB   | OTB   | OTB   | OTB   | OTB   | AOB   | OTB    | OTB   | AOB   |
| Harrat   | BA     | A     | BA    | BA     | A     | A      | A     | T     | T     | BA    | BA    | T     | A      | T     | T     |
| Subunit  | US     | US    | US    | US     | US    | US     | US    | LS    | US    | LS    | LS    | US    | US     | US    | US    |
| SiO2     | 47.78  | 47.70 | 47.65 | 47.58  | 47.58 | 47.57  | 47.56 | 47.52 | 47.37 | 47.32 | 47.24 | 47.11 | 47.04  | 47.01 | 46.90 |
| TiO2     | 1.58   | 1.41  | 1.40  | 1.90   | 1.42  | 1.31   | 1.52  | 1.17  | 1.80  | 1.52  | 1.02  | 1.53  | 1.96   | 1.41  | 1.54  |
| Al2O3    | 16.75  | 16.85 | 15.47 | 15.62  | 17.06 | 16.51  | 16.31 | 15.83 | 15.91 | 15.85 | 13.64 | 15.62 | 16.51  | 15.33 | 15.91 |
| FeO      | 11.14  | 9.95  | 10.36 | 11.11  | 10.52 | 10.88  | 10.95 | 10.17 | 10.71 | 10.76 | 11.04 | 11.10 | 11.85  | 10.92 | 10.51 |
| MnO      | 0.18   | 0.17  | 0.18  | 0.17   | 0.18  | 0.18   | 0.17  | 0.17  | 0.16  | 0.18  | 0.18  | 0.18  | 0.19   | 0.17  | 0.18  |
| MgO      | 11.53  | 7.41  | 9.97  | 9.72   | 7.30  | 8.87   | 8.34  | 8.35  | 8.40  | 8.00  | 14.72 | 9.08  | 8.12   | 12.46 | 9.10  |
| CaO      | 7.49   | 12.02 | 11.71 | 10.76  | 12.31 | 11.69  | 11.28 | 12.46 | 10.84 | 12.80 | 9.02  | 11.17 | 11.14  | 9.63  | 11.35 |
| Na2O     | 2.93   | 3.12  | 2.65  | 2.86   | 2.97  | 2.86   | 3.14  | 2.91  | 2.49  | 2.66  | 2.42  | 3.17  | 2.96   | 2.26  | 2.98  |
| K2O      | 0.40   | 0.43  | 0.34  | 0.64   | 0.35  | 0.20   | 0.41  | 0.32  | 0.67  | 0.27  | 0.29  | 0.59  | 0.39   | 0.31  | 0.61  |
| P2O5     | 0.24   | 0.22  | 0.16  | 0.25   | 0.17  | 0.15   | 0.22  | 0.16  | 0.27  | 0.18  | 0.15  | 0.22  | 0.29   | 0.17  | 0.27  |
| Total    | 100.02 | 99.29 | 99.88 | 100.61 | 99.85 | 100.21 | 99.91 | 99.06 | 98.62 | 99.53 | 99.72 | 99.77 | 100.45 | 99.67 | 99.34 |
| MI       | 121    | 131   | 223   | 214    | 136   | 182    | 168   | 226   | 136   | 114   | 449   | 222   | 106    | 317   | 222   |
| CR       | 166    | 210   | 476   | 353    | 184   | 296    | 266   | 442   | 240   | 260   | 643   | 335   | 133    | 469   | 347   |
| BA       | 64     | 151   | 65    | 59     | 57    | 21     | 128   | 32    | 142   | 43    | 46    | 105   | 29     | 37    | 258   |
| RB       | 3      | 4     | 3     | 6      | 1     | 1      | 6     | 2     | 9     | 2     | 3     | 8     | 2      | 3     | 8     |
| SR       | 456    | 411   | 285   | 416    | 355   | 285    | 377   | 292   | 600   | 302   | 238   | 388   | 444    | 455   | 443   |
| ZR       | 132    | 113   | 90    | 143    | 108   | 82     | 96    | 99    | 137   | 105   | 73    | 107   | 130    | 109   | 143   |
| Y        | 21     | 20    | 19    | 21     | 21    | 22     | 21    | 20    | 21    | 20    | 15    | 20    | 22     | 20    | 22    |
| NB       | 11     | 15    | 10    | 17     | 8     | 9      | 15    | 10    | 25    | 9     | 19    | 24    | 12     | 8     | 16    |
| GA       | 19     | 16    | 17    | 17     | 17    | 17     | 16    | 13    | 20    | 20    | 5     | 18    | 16     | 14    | 15    |
| CU       | 113    | 106   | 109   | 106    | 119   | 114    | 106   | 119   | 114   | 123   | 93    | 102   | 139    | 115   | 92    |
| ZN       | 79     | 78    | 77    | 82     | 76    | 78     | 78    | 76    | 85    | 82    | 71    | 80    | 81     | 78    | 73    |
| SC       | 30     | 31    | 28    | 28     | 32    | 30     | 28    | 30    | 25    | 31    | 23    | 25    | 28     | 27    | 29    |
| V        | 232    | 219   | 216   | 250    | 242   | 215    | 205   | 220   | 224   | 226   | 188   | 201   | 257    | 211   | 215   |
| LA       | 4      | 7     | 3     | 8      | 4     | 2      | 7     | 4     | 11    | 3     | 4     | 8     | 9      | 6     | 11    |
| CE       | 33     | 31    | 24    | 36     | 29    | 24     | 30    | 26    | 37    | 27    | 25    | 32    | 38     | 28    | 36    |
| AM       | 55.66  | 60.36 | 60.15 | 57.99  | 62.50 | 60.90  | 58.54 | 61.59 | 58.95 | 62.61 | 55.46 | 60.06 | 59.33  | 61.67 | 61.65 |
| or       | 2.36   | 2.54  | 2.01  | 3.78   | 2.07  | 1.18   | 2.42  | 1.89  | 3.96  | 1.60  | 1.71  | 3.49  | 2.30   | 1.83  | 3.60  |
| ab       | 24.79  | 20.16 | 19.42 | 20.21  | 19.31 | 20.30  | 20.68 | 18.20 | 21.07 | 18.23 | 20.48 | 17.72 | 20.98  | 19.12 | 17.56 |
| an       | 31.37  | 30.70 | 29.31 | 27.89  | 32.19 | 31.62  | 29.20 | 29.19 | 30.26 | 30.51 | 25.50 | 26.65 | 30.61  | 30.77 | 28.24 |
| ne       | 0.00   | 3.38  | 1.63  | 2.16   | 3.15  | 2.11   | 3.19  | 3.48  | 0.00  | 2.32  | 0.00  | 4.93  | 2.20   | 0.00  | 4.15  |
| di       | 3.44   | 22.50 | 22.55 | 19.41  | 22.82 | 20.78  | 20.72 | 25.82 | 17.78 | 26.06 | 14.76 | 22.32 | 18.65  | 12.87 | 21.45 |
| hy       | 8.18   | 0.00  | 0.00  | 0.00   | 0.00  | 0.00   | 0.00  | 0.00  | 2.75  | 0.00  | 1.90  | 0.00  | 0.00   | 5.51  | 0.00  |
| ol       | 24.66  | 15.32 | 20.38 | 21.30  | 15.66 | 19.76  | 18.66 | 16.36 | 17.15 | 15.90 | 31.44 | 19.59 | 19.52  | 24.87 | 19.22 |
| mt       | 1.80   | 1.61  | 1.67  | 1.78   | 1.70  | 1.75   | 1.77  | 1.64  | 1.73  | 1.74  | 1.78  | 1.78  | 1.91   | 1.75  | 1.70  |
| il       | 3.00   | 2.68  | 2.65  | 3.61   | 2.69  | 2.48   | 2.88  | 2.22  | 3.42  | 2.88  | 1.94  | 2.91  | 3.71   | 2.67  | 2.92  |
| ap       | 0.55   | 0.52  | 0.37  | 0.58   | 0.39  | 0.34   | 0.51  | 0.37  | 0.62  | 0.41  | 0.34  | 0.51  | 0.68   | 0.39  | 0.62  |

## SHAWAHIT-COMPLETE DATA - Page 4

| Sample                         | 4205  | 4238  | 4250  | 4252  | 4223  | 4240  |
|--------------------------------|-------|-------|-------|-------|-------|-------|
| Rock Type                      | AOB   | OTB   | OTB   | OTB   | AOB   | AOB   |
| Harrat                         | T     | T     | A     | A     | T     | T     |
| Subunit                        | US    | LS    | US    | US    | US    | US    |
| SiO <sub>2</sub>               | 46.71 | 46.70 | 46.67 | 46.54 | 45.49 | 46.47 |
| TiO <sub>2</sub>               | 1.38  | 1.53  | 1.53  | 1.29  | 1.19  | 2.05  |
| Al <sub>2</sub> O <sub>3</sub> | 15.50 | 14.46 | 15.18 | 15.63 | 15.29 | 14.95 |
| FeO                            | 10.65 | 10.55 | 11.03 | 11.01 | 10.94 | 10.92 |
| MnO                            | 0.17  | 0.18  | 0.18  | 0.18  | 0.18  | 0.17  |
| MgO                            | 7.87  | 11.66 | 10.39 | 9.05  | 9.23  | 10.30 |
| CaO                            | 13.42 | 10.72 | 11.42 | 10.91 | 13.00 | 10.46 |
| Na <sub>2</sub> O              | 2.97  | 2.39  | 2.79  | 2.90  | 2.83  | 2.89  |
| K <sub>2</sub> O               | 0.51  | 0.90  | 0.42  | 0.30  | 0.32  | 1.07  |
| P <sub>2</sub> O <sub>5</sub>  | 0.19  | 0.40  | 0.22  | 0.15  | 0.14  | 0.38  |
| Total                          | 99.37 | 99.49 | 99.82 | 97.96 | 98.61 | 99.66 |
| NI                             | 217   | 266   | 291   | 194   | 274   | 208   |
| CR                             | 367   | 504   | 386   | 347   | 434   | 348   |
| BA                             | 198   | 227   | 78    | 47    | 107   | 235   |
| RB                             | 6     | 16    | 6     | 2     | 4     | 16    |
| SR                             | 370   | 564   | 361   | 298   | 301   | 553   |
| ZR                             | 103   | 156   | 98    | 95    | 86    | 166   |
| Y                              | 20    | 18    | 20    | 20    | 17    | 20    |
| NB                             | 16    | 37    | 20    | 10    | 12    | 44    |
| GA                             | 16    | 17    | 16    | 19    | 16    | 17    |
| CU                             | 97    | 79    | 105   | 114   | 91    | 66    |
| ZN                             | 79    | 88    | 83    | 86    | 76    | 81    |
| SC                             | 28    | 24    | 28    | 24    | 24    | 25    |
| V                              | 203   | 197   | 209   | 194   | 182   | 227   |
| LA                             | 5     | 19    | 7     | 5     | 2     | 18    |
| CE                             | 28    | 50    | 30    | 29    | 26    | 49    |
| AN                             | 68.98 | 61.47 | 62.52 | 58.87 | 73.02 | 60.98 |
| or                             | 3.01  | 5.32  | 2.48  | 1.77  | 1.69  | 6.32  |
| ab                             | 12.35 | 16.34 | 16.58 | 20.08 | 10.37 | 15.78 |
| an                             | 27.46 | 26.07 | 27.66 | 28.75 | 28.07 | 24.66 |
| ne                             | 6.92  | 2.10  | 3.81  | 2.41  | 7.35  | 4.70  |
| di                             | 31.06 | 19.81 | 22.44 | 19.92 | 28.99 | 20.11 |
| ol                             | 13.91 | 24.44 | 21.81 | 20.57 | 17.71 | 21.69 |
| wt                             | 1.71  | 1.70  | 1.78  | 1.77  | 1.77  | 1.75  |
| il                             | 2.62  | 2.91  | 2.90  | 2.45  | 2.25  | 3.90  |
| ap                             | 0.43  | 0.94  | 0.50  | 0.35  | 0.33  | 0.87  |

HAMMAH-COMplete DATA - Page 1  
(25 samples)

| Sample   | 4272  | 4264  | 4261  | 4271  | 4233  | 4211  | 4164   | 4258   | 4155   | 4234   | 4273  | 4209  | 4228   | 4161   | 4214   |
|----------|-------|-------|-------|-------|-------|-------|--------|--------|--------|--------|-------|-------|--------|--------|--------|
| RockType | BEN   | BEN   | MUG   | HAW   | HAW   | HAW   | AOB    | HAW    | AOB    | AOB    | AOB   | HAW   | AOB    | AOB    | HAW    |
| Harriet  | A     | A     | A     | A     | A     | T     | BA     | T      | BA     | A      | A     | T     | T      | BA     | T      |
| SiO2     | 55.58 | 52.58 | 52.33 | 49.60 | 48.71 | 48.50 | 48.39  | 48.39  | 48.30  | 48.13  | 47.95 | 47.92 | 47.78  | 47.74  | 47.66  |
| TiO2     | 1.03  | 1.89  | 1.57  | 2.28  | 2.22  | 2.50  | 2.15   | 2.22   | 2.07   | 2.32   | 2.23  | 2.11  | 2.49   | 2.11   | 2.47   |
| Al2O3    | 17.77 | 17.33 | 16.65 | 16.81 | 16.32 | 16.60 | 15.79  | 16.34  | 16.23  | 15.93  | 16.03 | 15.11 | 16.23  | 15.52  | 16.24  |
| FeO      | 9.20  | 10.12 | 11.98 | 11.45 | 11.87 | 10.68 | 12.76  | 12.23  | 10.14  | 11.99  | 10.44 | 10.47 | 12.13  | 11.16  | 11.91  |
| MnO      | 0.23  | 0.24  | 0.27  | 0.22  | 0.20  | 0.17  | 0.21   | 0.22   | 0.17   | 0.19   | 0.17  | 0.17  | 0.18   | 0.18   | 0.20   |
| MgO      | 1.55  | 2.99  | 2.53  | 4.73  | 5.70  | 5.59  | 8.04   | 6.34   | 9.13   | 7.53   | 8.16  | 8.08  | 7.72   | 9.08   | 7.03   |
| CaO      | 3.99  | 5.53  | 5.42  | 8.00  | 8.70  | 8.92  | 8.76   | 8.60   | 9.33   | 9.48   | 9.07  | 9.77  | 8.49   | 9.34   | 8.90   |
| Na2O     | 6.27  | 6.04  | 5.75  | 4.68  | 4.42  | 4.35  | 3.58   | 4.17   | 3.64   | 3.66   | 3.57  | 4.09  | 3.93   | 3.70   | 4.11   |
| K2O      | 2.68  | 2.01  | 1.96  | 1.26  | 1.14  | 1.50  | 0.79   | 1.00   | 1.24   | 0.81   | 1.32  | 1.24  | 0.83   | 1.01   | 1.07   |
| P2O5     | 0.77  | 1.15  | 1.32  | 0.81  | 0.71  | 0.61  | 0.57   | 0.72   | 0.40   | 0.55   | 0.56  | 0.62  | 0.55   | 0.49   | 0.63   |
| Total    | 99.07 | 99.89 | 99.78 | 99.85 | 99.99 | 99.61 | 101.04 | 100.22 | 100.65 | 100.59 | 99.49 | 99.57 | 100.33 | 100.33 | 100.20 |
| NI       | 7     | 1     | 2     | 34    | 66    | 42    | 172    | 96     | 183    | 117    | 141   | 179   | 127    | 173    | 104    |
| CR       | 0     | 0     | 2     | 57    | 117   | 87    | 265    | 165    | 340    | 262    | 257   | 386   | 182    | 392    | 169    |
| BA       | 461   | 302   | 291   | 189   | 160   | 217   | 95     | 163    | 165    | 107    | 250   | 169   | 124    | 130    | 100    |
| RB       | 31    | 23    | 22    | 12    | 10    | 20    | 5      | 7      | 16     | 7      | 16    | 16    | 9      | 11     | 9      |
| SR       | 2055  | 800   | 735   | 658   | 656   | 907   | 408    | 482    | 512    | 586    | 1667  | 1029  | 755    | 561    | 567    |
| ZR       | 640   | 383   | 422   | 276   | 256   | 286   | 200    | 294    | 259    | 180    | 279   | 270   | 218    | 255    | 245    |
| Y        | 34    | 34    | 41    | 28    | 29    | 23    | 29     | 35     | 22     | 25     | 22    | 22    | 22     | 23     | 27     |
| NB       | 80    | 51    | 54    | 35    | 32    | 46    | 24     | 29     | 38     | 23     | 40    | 36    | 21     | 33     | 29     |
| GA       | 14    | 15    | 23    | 21    | 14    | 21    | 17     | 19     | 13     | 15     | 17    | 17    | 14     | 23     | 15     |
| CU       | 28    | 20    | 21    | 50    | 52    | 46    | 68     | 63     | 69     | 86     | 64    | 83    | 61     | 82     | 62     |
| ZN       | 104   | 94    | 108   | 89    | 85    | 92    | 99     | 92     | 80     | 81     | 83    | 80    | 79     | 81     | 83     |
| SC       | 7     | 9     | 8     | 16    | 17    | 20    | 22     | 21     | 27     | 22     | 21    | 22    | 18     | 25     | 22     |
| V        | 24    | 50    | 27    | 154   | 166   | 215   | 184    | 162    | 217    | 225    | 197   | 194   | 188    | 217    | 200    |
| LA       | 71    | 52    | 54    | 33    | 27    | 32    | 17     | 27     | 19     | 20     | 29    | 30    | 22     | 22     | 24     |
| CE       | 130   | 106   | 111   | 76    | 68    | 71    | 52     | 68     | 50     | 55     | 66    | 67    | 57     | 56     | 60     |
| AN       | 19.92 | 24.63 | 23.53 | 38.59 | 42.61 | 45.90 | 46.36  | 44.00  | 52.58  | 48.23  | 49.85 | 47.42 | 46.63  | 50.45  | 47.19  |
| or       | 15.84 | 11.88 | 11.58 | 7.56  | 6.74  | 8.86  | 4.67   | 5.91   | 7.33   | 4.79   | 7.80  | 7.33  | 4.91   | 5.97   | 6.09   |
| ab       | 49.97 | 43.57 | 44.95 | 33.55 | 28.73 | 25.80 | 28.56  | 29.16  | 21.90  | 26.46  | 23.96 | 21.30 | 27.69  | 22.35  | 25.55  |
| an       | 12.43 | 14.24 | 13.83 | 21.08 | 21.33 | 21.89 | 24.68  | 22.92  | 24.29  | 24.65  | 23.82 | 19.21 | 24.20  | 22.76  | 22.82  |
| ne       | 1.67  | 4.09  | 2.01  | 3.28  | 4.70  | 5.97  | 0.94   | 3.32   | 4.82   | 2.44   | 3.38  | 7.21  | 3.02   | 4.85   | 5.00   |
| di       | 2.02  | 4.79  | 3.78  | 11.10 | 14.30 | 15.17 | 12.36  | 12.48  | 15.73  | 15.42  | 14.30 | 20.56 | 11.76  | 16.64  | 14.16  |
| ol       | 12.03 | 13.55 | 15.78 | 15.36 | 16.81 | 14.17 | 22.50  | 18.74  | 20.20  | 19.35  | 19.15 | 16.95 | 20.94  | 20.95  | 18.65  |
| wt       | 1.48  | 1.62  | 1.93  | 1.84  | 1.91  | 1.73  | 2.06   | 1.97   | 1.68   | 1.94   | 1.68  | 1.68  | 1.96   | 1.80   | 1.91   |
| il       | 1.96  | 3.60  | 2.98  | 4.32  | 4.21  | 4.74  | 4.08   | 4.22   | 3.93   | 4.40   | 4.23  | 4.00  | 4.73   | 4.01   | 4.69   |
| ap       | 1.78  | 2.66  | 3.06  | 1.67  | 1.63  | 1.41  | 1.33   | 1.66   | 0.94   | 1.28   | 1.29  | 1.44  | 1.28   | 1.12   | 1.46   |

## HAMMAH-COMPLETE DATA - Page 2

| Sample   | 4152   | 4237   | 4212  | 4263  | 4167  | 4213  | 4274  | 4268  | 4265  | 4221  |
|----------|--------|--------|-------|-------|-------|-------|-------|-------|-------|-------|
| RockType | AOB    | AOB    | HAW   | HAW   | AOB   | AOB   | HAW   | HAW   | HAW   | AOB   |
| Harriet  | BA     | T      | T     | A     | BA    | T     | A     | A     | A     | T     |
| SiO2     | 47.39  | 47.37  | 47.13 | 46.47 | 46.37 | 45.95 | 45.70 | 45.64 | 45.62 | 45.59 |
| TiO2     | 2.31   | 2.79   | 2.78  | 2.83  | 2.43  | 2.28  | 2.13  | 2.17  | 2.60  | 2.15  |
| Al2O3    | 15.31  | 16.63  | 16.93 | 16.83 | 16.20 | 14.84 | 15.25 | 15.43 | 15.18 | 14.80 |
| FeO      | 11.62  | 12.41  | 11.80 | 11.48 | 11.53 | 11.65 | 11.35 | 11.37 | 12.29 | 11.89 |
| MnO      | 0.18   | 0.21   | 0.18  | 0.18  | 0.17  | 0.19  | 0.18  | 0.19  | 0.19  | 0.18  |
| MgO      | 9.37   | 6.62   | 6.19  | 6.19  | 7.69  | 10.73 | 8.05  | 7.53  | 7.99  | 8.41  |
| CaO      | 9.57   | 9.00   | 9.05  | 9.52  | 11.16 | 9.52  | 11.29 | 10.62 | 9.37  | 11.50 |
| Na2O     | 3.43   | 3.55   | 4.13  | 4.04  | 3.23  | 3.34  | 3.55  | 4.07  | 4.54  | 3.41  |
| K2O      | 0.92   | 0.79   | 1.06  | 1.20  | 0.76  | 0.78  | 1.24  | 1.14  | 1.06  | 0.89  |
| P2O5     | 0.33   | 0.79   | 0.59  | 0.59  | 0.29  | 0.40  | 0.57  | 0.60  | 0.58  | 0.43  |
| Total    | 100.42 | 100.16 | 99.84 | 99.33 | 99.83 | 99.67 | 99.71 | 98.76 | 99.42 | 99.25 |
| NI       | 177    | 65     | 66    | 54    | 120   | 279   | 152   | 153   | 148   | 239   |
| CR       | 271    | 127    | 116   | 77    | 163   | 615   | 263   | 226   | 213   | 390   |
| SA       | 122    | 125    | 181   | 202   | 105   | 76    | 407   | 738   | 307   | 148   |
| RB       | 10     | 7      | 11    | 14    | 8     | 7     | 16    | 14    | 7     | 10    |
| SR       | 481    | 535    | 737   | 833   | 543   | 531   | 760   | 697   | 758   | 664   |
| ZR       | 178    | 223    | 246   | 241   | 158   | 185   | 215   | 216   | 237   | 167   |
| Y        | 22     | 30     | 26    | 25    | 22    | 23    | 21    | 22    | 26    | 21    |
| NB       | 24     | 23     | 32    | 49    | 22    | 23    | 51    | 39    | 54    | 30    |
| GA       | 18     | 20     | 24    | 19    | 18    | 17    | 20    | 18    | 21    | 17    |
| CU       | 72     | 66     | 54    | 53    | 101   | 76    | 93    | 64    | 70    | 71    |
| ZN       | 89     | 90     | 77    | 80    | 80    | 75    | 103   | 86    | 93    | 91    |
| SC       | 21     | 22     | 20    | 17    | 27    | 24    | 25    | 21    | 19    | 24    |
| V        | 239    | 211    | 218   | 231   | 263   | 223   | 236   | 207   | 196   | 224   |
| LA       | 14     | 21     | 27    | 26    | 10    | 18    | 30    | 25    | 34    | 19    |
| CE       | 45     | 59     | 65    | 65    | 39    | 48    | 69    | 62    | 71    | 51    |
| AN       | 52.88  | 48.19  | 49.93 | 53.47 | 61.36 | 56.52 | 65.52 | 59.21 | 52.00 | 63.93 |
| or       | 5.44   | 4.67   | 6.26  | 7.09  | 4.49  | 4.61  | 7.33  | 6.74  | 6.26  | 5.26  |
| ab       | 21.09  | 29.14  | 24.60 | 21.10 | 17.29 | 17.84 | 10.64 | 14.10 | 16.53 | 12.67 |
| an       | 23.66  | 27.11  | 24.53 | 24.25 | 27.46 | 23.20 | 20.22 | 20.47 | 17.91 | 22.45 |
| ne       | 4.30   | 0.48   | 5.60  | 7.09  | 5.44  | 5.64  | 12.34 | 11.02 | 11.85 | 8.77  |
| di       | 17.64  | 10.22  | 13.64 | 15.76 | 21.30 | 17.38 | 26.23 | 23.22 | 20.31 | 26.07 |
| ol       | 21.41  | 19.55  | 16.79 | 15.58 | 16.83 | 24.00 | 15.86 | 15.99 | 18.41 | 17.18 |
| mt       | 1.87   | 2.00   | 1.90  | 1.86  | 1.86  | 1.87  | 1.83  | 1.83  | 1.99  | 1.91  |
| il       | 4.38   | 5.30   | 5.28  | 5.37  | 4.62  | 4.32  | 4.05  | 4.13  | 4.94  | 4.09  |
| ap       | 0.77   | 1.83   | 1.36  | 1.37  | 0.68  | 0.93  | 1.33  | 1.39  | 1.35  | 0.98  |

MADINAH-OTB-HAWAIIITE-MUGEARITE-BENMOREITE-TRACHYTE - Page 1  
(55 samples)

| Sample                         | 4147   | 4232   | 2390   | 2373   | 4257  | 2377   | 2376  | 2372   | 4259  | 2371  | 4176   | 2391   | 4146   | 4097   | 4215   |
|--------------------------------|--------|--------|--------|--------|-------|--------|-------|--------|-------|-------|--------|--------|--------|--------|--------|
| Rock Type                      | TRACH  | BEN    | TRACH  | BEN    | BEN   | BEN    | BEN   | BEN    | BEN   | BEN   | MUG    | MUG    | MUG    | MUG    | HAW    |
| Harrat                         | R      | T      | R      | R      | T     | R      | R     | R      | T     | R     | BA     | R      | R      | R      | T      |
| Subunit                        | Qm4    | Qm1    | Qm5    | Qm4    | Qm1   | Qm3    | Qm3   | Qm4    | Qm1   | Qm4   | Qmb    | Qm5    | Qm3    | Qm4    | Qm1    |
| SiO <sub>2</sub>               | 63.00  | 59.01  | 58.87  | 57.75  | 57.52 | 57.51  | 56.55 | 55.66  | 55.15 | 54.73 | 54.07  | 53.26  | 50.61  | 50.34  | 50.09  |
| TiO <sub>2</sub>               | 0.17   | 0.66   | 0.54   | 0.88   | 0.77  | 0.89   | 0.88  | 1.15   | 1.06  | 1.32  | 1.71   | 1.87   | 2.07   | 2.19   | 2.12   |
| Al <sub>2</sub> O <sub>3</sub> | 17.55  | 17.23  | 17.62  | 17.19  | 17.36 | 17.66  | 17.16 | 16.47  | 17.11 | 16.31 | 17.15  | 16.81  | 16.47  | 16.19  | 16.94  |
| FeO                            | 4.91   | 8.32   | 7.58   | 9.88   | 8.51  | 9.19   | 9.71  | 11.27  | 10.32 | 11.58 | 10.07  | 10.40  | 12.65  | 12.11  | 11.43  |
| MnO                            | 0.18   | 0.25   | 0.24   | 0.30   | 0.26  | 0.26   | 0.26  | 0.34   | 0.31  | 0.34  | 0.23   | 0.28   | 0.27   | 0.27   | 0.21   |
| MgO                            | 0.17   | 0.81   | 0.64   | 0.99   | 0.82  | 1.13   | 1.13  | 1.37   | 1.32  | 1.55  | 2.83   | 2.67   | 2.93   | 3.27   | 5.67   |
| CaO                            | 1.37   | 3.15   | 3.27   | 3.97   | 3.71  | 3.83   | 4.14  | 4.83   | 4.78  | 5.39  | 5.50   | 5.88   | 6.43   | 7.28   | 8.63   |
| Na <sub>2</sub> O              | 7.98   | 6.66   | 7.53   | 6.06   | 6.85  | 6.37   | 6.05  | 5.77   | 6.50  | 5.56  | 5.80   | 5.75   | 5.65   | 5.21   | 4.20   |
| K <sub>2</sub> O               | 5.07   | 3.79   | 3.73   | 3.38   | 3.41  | 3.18   | 3.09  | 2.66   | 2.72  | 2.44  | 2.55   | 2.26   | 1.77   | 1.93   | 1.12   |
| P <sub>2</sub> O <sub>5</sub>  | 0.04   | 0.35   | 0.26   | 0.48   | 0.39  | 0.56   | 0.55  | 0.64   | 0.62  | 0.77  | 0.50   | 1.09   | 1.45   | 1.66   | 0.56   |
| Total                          | 100.44 | 100.23 | 100.29 | 100.88 | 99.60 | 100.57 | 99.51 | 100.16 | 99.89 | 99.99 | 100.41 | 100.26 | 100.49 | 100.44 | 100.96 |
| MI                             | 17     | 7      | 8      | 0      | 6     | 3      | 1     | 1      | 3     | 2     | 15     | 7      | 0      | 0      | 67     |
| CR                             | 0      | 0      | 3      | 0      | 0     | 0      | 0     | 2      | 0     | 2     | 4      | 6      | 0      | 0      | 103    |
| BA                             | 11     | 776    | 474    | 639    | 518   | 412    | 518   | 635    | 604   | 518   | 451    | 372    | 169    | 288    | 183    |
| RB                             | 71     | 34     | 31     | 24     | 31    | 31     | 27    | 22     | 19    | 22    | 19     | 18     | 14     | 15     | 6      |
| SR                             | 28     | 268    | 343    | 292    | 316   | 324    | 389   | 359    | 400   | 375   | 416    | 458    | 589    | 541    | 494    |
| ZR                             | 1496   | 1048   | 787    | 505    | 730   | 688    | 700   | 476    | 768   | 462   | 488    | 480    | 394    | 358    | 309    |
| Y                              | 99     | 58     | 53     | 52     | 48    | 50     | 50    | 56     | 73    | 56    | 43     | 47     | 47     | 51     | 30     |
| NB                             | 154    | 83     | 77     | 53     | 73    | 71     | 72    | 50     | 77    | 49    | 48     | 47     | 41     | 47     | 28     |
| GA                             | 50     | 30     | 32     | 29     | 26    | 26     | 28    | 33     | 28    | 30    | 25     | 29     | 20     | 22     | 21     |
| CU                             | 13     | 23     | 12     | 15     | 14    | 36     | 27    | 17     | 27    | 21    | 29     | 20     | 26     | 21     | 65     |
| ZM                             | 211    | 134    | 133    | 132    | 110   | 140    | 131   | 152    | 145   | 149   | 117    | 136    | 114    | 126    | 89     |
| SC                             | 3      | 12     | 7      | 18     | 10    | 9      | 8     | 28     | 16    | 31    | 19     | 20     | 13     | 17     | 23     |
| V                              | 12     | 12     | 12     | 12     | 11    | 14     | 14    | 15     | 15    | 18    | 108    | 61     | 50     | 59     | 175    |
| LA                             | 120    | 73     | 65     | 52     | 64    | 62     | 58    | 53     | 74    | 55    | 47     | 49     | 47     | 49     | 25     |
| CE                             | 221    | 150    | 129    | 107    | 124   | 124    | 117   | 112    | 148   | 117   | 99     | 105    | 98     | 111    | 61     |
| AN                             | 0.00   | 10.47  | 6.40   | 16.47  | 12.06 | 16.88  | 17.82 | 18.95  | 17.58 | 20.96 | 24.48  | 23.69  | 25.78  | 28.93  | 42.72  |
| or                             | 29.96  | 22.40  | 22.04  | 19.98  | 20.15 | 18.79  | 18.26 | 15.72  | 16.07 | 14.42 | 15.07  | 13.36  | 10.46  | 11.41  | 6.62   |
| ab                             | 52.43  | 50.66  | 47.74  | 49.30  | 47.78 | 50.23  | 48.63 | 47.85  | 44.43 | 46.55 | 40.82  | 43.12  | 38.74  | 37.07  | 32.27  |
| an                             | 0.00   | 5.93   | 3.26   | 9.72   | 6.55  | 10.20  | 10.54 | 11.19  | 9.48  | 12.34 | 13.23  | 13.38  | 13.46  | 15.09  | 24.06  |
| ne                             | 5.21   | 3.08   | 8.66   | 1.07   | 5.52  | 1.99   | 1.39  | 0.53   | 5.73  | 0.27  | 4.47   | 3.00   | 5.83   | 3.80   | 1.77   |
| di                             | 5.78   | 6.44   | 9.82   | 5.98   | 8.09  | 4.48   | 5.57  | 7.47   | 8.82  | 8.10  | 9.13   | 7.37   | 7.65   | 8.64   | 12.52  |
| ol                             | 4.26   | 8.40   | 5.99   | 10.58  | 7.86  | 10.52  | 10.73 | 12.05  | 10.37 | 12.28 | 11.77  | 12.41  | 15.18  | 14.64  | 16.70  |
| ac                             | 1.59   | 0.00   | 0.00   | 0.00   | 0.00  | 0.00   | 0.00  | 0.00   | 0.00  | 0.00  | 0.00   | 0.00   | 0.00   | 0.00   | 0.00   |
| mt                             | 0.00   | 1.33   | 1.22   | 1.59   | 1.38  | 1.48   | 1.57  | 1.81   | 1.67  | 1.87  | 1.62   | 1.68   | 2.04   | 1.96   | 1.84   |
| il                             | 0.32   | 1.25   | 1.03   | 1.67   | 1.46  | 1.69   | 1.66  | 2.18   | 2.02  | 2.51  | 3.25   | 3.55   | 3.92   | 4.15   | 4.02   |
| ap                             | 0.09   | 0.82   | 0.61   | 1.10   | 0.91  | 1.29   | 1.27  | 1.48   | 1.44  | 1.79  | 1.15   | 2.51   | 3.35   | 3.83   | 1.29   |

## MADINAH-OTB-HAWAIIITE-MUGEARITE-BENMOREITE-TRACHYTE - Page 2

| Sample    | 2384   | 4185   | 4186   | 2416   | 2394   | 4170   | 2409   | 4145  | 4114   | 4148   | 2393  | 4162   | 4216  | 2420  | 2395  |
|-----------|--------|--------|--------|--------|--------|--------|--------|-------|--------|--------|-------|--------|-------|-------|-------|
| Rock Type | HAW    | HAW   | HAW    | OTB    | HAW   | HAW    | HAW   | HAW   | HAW   |
| Harriet   | R      | BA     | BA     | R      | R      | R      | R      | R     | R      | R      | R     | BA     | T     | R     | R     |
| Subunit   | Qmb    | Qml    | Qml    | Qmb    | Qm5    | Qm2    | Qml    | Qm3   | Qm5    | Qm4    | Qmb   | Qm2    | Qml   | Qmb   | Qm5   |
| SiO2      | 49.50  | 49.40  | 49.37  | 49.28  | 49.22  | 49.16  | 49.14  | 49.13 | 49.10  | 49.03  | 48.99 | 48.80  | 48.71 | 48.63 | 48.56 |
| TiO2      | 2.52   | 2.14   | 2.05   | 2.32   | 2.53   | 2.36   | 2.40   | 2.40  | 2.50   | 1.57   | 2.22  | 2.61   | 2.02  | 2.34  | 2.51  |
| Al2O3     | 16.72  | 16.12  | 16.50  | 16.41  | 16.48  | 16.39  | 16.52  | 16.24 | 16.40  | 15.96  | 16.20 | 15.82  | 16.30 | 16.47 | 16.15 |
| FeO       | 12.04  | 9.86   | 11.46  | 11.88  | 12.10  | 12.03  | 11.63  | 12.35 | 12.92  | 10.64  | 12.06 | 10.35  | 10.75 | 11.89 | 12.49 |
| MnO       | 0.21   | 0.16   | 0.19   | 0.24   | 0.26   | 0.20   | 0.20   | 0.25  | 0.26   | 0.17   | 0.24  | 0.16   | 0.17  | 0.23  | 0.26  |
| MgO       | 4.92   | 7.81   | 6.82   | 4.72   | 3.86   | 6.22   | 5.88   | 3.50  | 3.77   | 9.15   | 4.46  | 8.13   | 6.85  | 5.18  | 3.77  |
| CaO       | 7.90   | 8.43   | 7.93   | 7.95   | 7.22   | 8.49   | 8.14   | 7.02  | 7.12   | 11.01  | 8.08  | 8.58   | 7.96  | 8.53  | 7.33  |
| Na2O      | 4.50   | 4.26   | 4.51   | 4.25   | 5.04   | 4.20   | 4.59   | 5.48  | 5.22   | 2.88   | 4.76  | 4.05   | 5.06  | 4.39  | 4.88  |
| K2O       | 1.34   | 1.54   | 1.29   | 1.47   | 1.71   | 1.06   | 1.23   | 1.82  | 1.71   | 0.40   | 1.51  | 1.61   | 1.45  | 1.23  | 1.69  |
| P2O5      | 0.54   | 0.48   | 0.61   | 1.01   | 1.68   | 0.56   | 0.65   | 1.69  | 1.68   | 0.19   | 1.02  | 0.34   | 0.58  | 0.88  | 1.66  |
| Total     | 100.19 | 100.20 | 100.72 | 100.02 | 100.11 | 100.67 | 100.38 | 99.88 | 100.68 | 101.01 | 99.54 | 100.45 | 99.84 | 99.76 | 99.10 |
| NI        | 27     | 148    | 126    | 33     | 0      | 83     | 87     | 0     | 0      | 167    | 28    | 135    | 127   | 44    | 10    |
| CR        | 20     | 268    | 246    | 41     | 3      | 118    | 110    | 5     | 7      | 357    | 34    | 268    | 194   | 60    | 19    |
| BA        | 214    | 266    | 139    | 232    | 253    | 141    | 159    | 256   | 257    | 38     | 233   | 161    | 200   | 185   | 273   |
| PB        | 10     | 16     | 13     | 11     | 13     | 8      | 10     | 15    | 13     | 4      | 12    | 18     | 16    | 8     | 13    |
| SR        | 493    | 588    | 656    | 540    | 585    | 479    | 537    | 562   | 597    | 305    | 559   | 526    | 746   | 528   | 567   |
| ZR        | 299    | 299    | 299    | 324    | 357    | 236    | 263    | 362   | 362    | 104    | 334   | 229    | 302   | 280   | 356   |
| Y         | 34     | 22     | 24     | 39     | 46     | 29     | 29     | 44    | 45     | 20     | 38    | 22     | 24    | 35    | 45    |
| MB        | 32     | 39     | 36     | 32     | 44     | 23     | 33     | 45    | 43     | 9      | 34    | 39     | 41    | 27    | 43    |
| GA        | 19     | 18     | 16     | 24     | 25     | 19     | 21     | 23    | 21     | 20     | 23    | 24     | 19    | 23    | 23    |
| CU        | 40     | 67     | 68     | 44     | 26     | 65     | 57     | 29    | 20     | 121    | 36    | 59     | 62    | 53    | 26    |
| ZN        | 103    | 77     | 79     | 112    | 118    | 95     | 82     | 114   | 117    | 75     | 109   | 78     | 89    | 109   | 119   |
| SC        | 21     | 20     | 20     | 19     | 16     | 23     | 18     | 17    | 17     | 30     | 20    | 21     | 19    | 19    | 16    |
| V         | 184    | 189    | 173    | 132    | 82     | 198    | 163    | 84    | 87     | 240    | 122   | 213    | 176   | 152   | 84    |
| LA        | 27     | 25     | 28     | 33     | 42     | 21     | 27     | 46    | 46     | 3      | 33    | 17     | 29    | 26    | 43    |
| CE        | 65     | 58     | 65     | 78     | 98     | 55     | 66     | 99    | 102    | 27     | 80    | 45     | 63    | 67    | 99    |
| AN        | 40.13  | 43.84  | 41.59  | 37.24  | 32.25  | 42.78  | 40.77  | 29.01 | 31.49  | 54.71  | 37.07 | 46.40  | 40.75 | 41.55 | 33.12 |
| or        | 7.92   | 9.10   | 7.62   | 8.69   | 10.11  | 6.26   | 7.27   | 10.76 | 10.11  | 2.36   | 8.92  | 9.51   | 8.57  | 7.27  | 9.99  |
| ab        | 32.03  | 26.03  | 29.45  | 32.22  | 36.34  | 30.42  | 30.28  | 35.10 | 35.40  | 24.37  | 31.20 | 23.37  | 25.42 | 30.39 | 34.67 |
| an        | 21.47  | 20.32  | 20.97  | 19.12  | 17.30  | 22.74  | 20.84  | 14.34 | 16.27  | 29.44  | 18.38 | 20.23  | 17.48 | 21.60 | 17.17 |
| ne        | 3.28   | 5.43   | 4.72   | 4.32   | 3.42   | 2.77   | 4.64   | 6.11  | 4.75   | 0.00   | 4.92  | 5.90   | 9.42  | 3.66  | 3.59  |
| di        | 11.85  | 14.99  | 11.88  | 11.47  | 6.34   | 13.00  | 12.65  | 7.97  | 6.80   | 19.50  | 12.58 | 16.36  | 14.99 | 12.45 | 7.04  |
| hy        | 0.00   | 0.00   | 0.00   | 0.00   | 0.00   | 0.00   | 0.00   | 0.00  | 0.00   | 0.71   | 0.00  | 0.00   | 0.00  | 0.00  | 0.00  |
| ol        | 15.83  | 17.68  | 19.07  | 15.69  | 16.10  | 17.88  | 16.90  | 15.29 | 16.78  | 19.60  | 15.14 | 17.76  | 17.18 | 16.13 | 16.16 |
| xt        | 1.94   | 1.59   | 1.84   | 1.91   | 1.94   | 2.00   | 1.87   | 1.99  | 2.09   | 1.71   | 1.94  | 1.67   | 1.73  | 1.91  | 2.02  |
| il        | 4.78   | 4.07   | 3.89   | 4.40   | 4.81   | 4.48   | 4.55   | 4.55  | 4.74   | 2.59   | 4.22  | 4.96   | 3.83  | 4.44  | 4.76  |
| ap        | 1.24   | 1.11   | 1.40   | 2.33   | 3.89   | 1.30   | 1.51   | 3.92  | 3.90   | 0.44   | 2.37  | 0.79   | 1.33  | 2.04  | 3.84  |

## MADINAH-OTB-HAWAIIITE-MUGEARITE-BENMOREITE-TRACHYTE - Page 3

| Sample    | 4236   | 4175  | 2378   | 4200   | 4171   | 4182   | 4194   | 2450  | 2379  | 4155   | 4199   | 4156   | 4160   | 4052   | 2446  |
|-----------|--------|-------|--------|--------|--------|--------|--------|-------|-------|--------|--------|--------|--------|--------|-------|
| Rock Type | HAW    | HAW   | OTB    | HAW    | OTB    | HAW    | OTB    | HAW   | OTB   | HAW    | HAW    | HAW    | HAW    | HAW    | HAW   |
| Harrat    | T      | R     | R      | BA     | R      | BA     | T      | R     | R     | BA     | BA     | BA     | BA     | R      | R     |
| Subunit   | Qm1    | Qm1   | Qm4    | Qm2    | Qm2    | Qmb    | Qm1    | Qm1   | Qm4   | Qm2    | Qm2    | Qmb    | Qmb    | Qm7    | Qmb   |
| SiO2      | 48.32  | 48.14 | 48.12  | 48.10  | 48.04  | 48.03  | 47.93  | 47.88 | 47.86 | 47.56  | 47.38  | 47.31  | 47.30  | 47.30  | 47.03 |
| TiO2      | 2.68   | 2.45  | 1.63   | 2.39   | 1.78   | 2.59   | 1.77   | 1.92  | 1.99  | 2.49   | 2.37   | 2.76   | 2.81   | 2.95   | 2.61  |
| Al2O3     | 16.93  | 16.08 | 16.77  | 15.81  | 16.50  | 16.31  | 16.38  | 15.84 | 15.55 | 15.74  | 15.70  | 16.11  | 16.20  | 16.15  | 16.26 |
| FeO       | 12.26  | 12.03 | 10.29  | 11.62  | 11.21  | 11.78  | 10.85  | 11.41 | 11.21 | 11.65  | 11.76  | 12.19  | 12.73  | 12.98  | 11.92 |
| MnO       | 0.21   | 0.21  | 0.17   | 0.19   | 0.18   | 0.18   | 0.18   | 0.19  | 0.19  | 0.19   | 0.19   | 0.17   | 0.18   | 0.22   | 0.21  |
| MgO       | 5.59   | 6.37  | 8.14   | 8.23   | 8.68   | 6.72   | 8.96   | 7.27  | 6.70  | 8.40   | 8.47   | 7.54   | 7.10   | 5.97   | 6.02  |
| CaO       | 8.39   | 8.48  | 11.62  | 8.55   | 10.93  | 7.57   | 11.73  | 8.84  | 12.24 | 8.90   | 8.61   | 7.92   | 7.63   | 8.72   | 8.92  |
| Na2O      | 4.21   | 4.17  | 2.87   | 4.02   | 2.95   | 5.09   | 2.61   | 4.00  | 2.71  | 4.05   | 4.07   | 4.67   | 4.91   | 4.21   | 4.01  |
| K2O       | 1.07   | 1.14  | 0.44   | 1.15   | 0.39   | 1.30   | 0.24   | 1.07  | 0.52  | 0.98   | 1.14   | 1.13   | 1.28   | 0.92   | 0.98  |
| P2O5      | 0.66   | 0.85  | 0.17   | 0.53   | 0.23   | 0.67   | 0.23   | 0.52  | 0.19  | 0.55   | 0.55   | 0.61   | 0.66   | 1.02   | 0.87  |
| Total     | 100.32 | 99.92 | 100.21 | 100.59 | 100.88 | 100.24 | 100.87 | 98.94 | 99.16 | 100.51 | 100.23 | 100.40 | 100.80 | 100.44 | 98.83 |
| NI        | 32     | 85    | 110    | 146    | 150    | 94     | 154    | 149   | 65    | 150    | 157    | 128    | 98     | 58     | 67    |
| CR        | 22     | 154   | 223    | 268    | 257    | 130    | 299    | 270   | 202   | 296    | 319    | 229    | 137    | 117    | 144   |
| BA        | 241    | 192   | 83     | 119    | 32     | 112    | 13     | 109   | 187   | 83     | 109    | 75     | 92     | 97     | 135   |
| RB        | 10     | 9     | 4      | 12     | 3      | 12     | 2      | 11    | 5     | 8      | 10     | 9      | 11     | 6      | 8     |
| SR        | 594    | 497   | 372    | 715    | 390    | 905    | 355    | 485   | 402   | 668    | 691    | 817    | 903    | 584    | 586   |
| ZR        | 261    | 246   | 103    | 291    | 120    | 369    | 112    | 253   | 124   | 273    | 283    | 328    | 365    | 245    | 229   |
| Y         | 31     | 32    | 19     | 26     | 21     | 23     | 21     | 28    | 23    | 27     | 25     | 22     | 23     | 34     | 30    |
| NB        | 33     | 32    | 10     | 36     | 8      | 30     | 8      | 29    | 14    | 28     | 33     | 27     | 33     | 26     | 28    |
| GA        | 23     | 21    | 18     | 20     | 20     | 25     | 13     | 18    | 18    | 21     | 15     | 22     | 22     | 23     | 24    |
| CU        | 49     | 62    | 96     | 69     | 124    | 62     | 124    | 72    | 126   | 76     | 70     | 64     | 50     | 41     | 62    |
| ZN        | 69     | 99    | 76     | 84     | 81     | 104    | 72     | 86    | 90    | 82     | 81     | 100    | 103    | 97     | 94    |
| SC        | 20     | 23    | 28     | 22     | 27     | 15     | 32     | 20    | 32    | 22     | 21     | 15     | 16     | 22     | 22    |
| V         | 198    | 190   | 249    | 205    | 240    | 180    | 259    | 171   | 288   | 211    | 205    | 190    | 188    | 193    | 183   |
| LA        | 26     | 27    | 5      | 27     | 4      | 31     | 5      | 23    | 5     | 23     | 25     | 25     | 31     | 26     | 24    |
| CE        | 66     | 66    | 26     | 64     | 31     | 76     | 28     | 57    | 29    | 62     | 63     | 67     | 74     | 81     | 63    |
| AN        | 44.77  | 42.88 | 59.25  | 46.48  | 57.03  | 40.04  | 59.37  | 46.42 | 57.00 | 47.87  | 48.13  | 44.20  | 42.94  | 43.64  | 45.96 |
| or        | 6.32   | 6.74  | 2.60   | 6.80   | 2.30   | 7.68   | 1.42   | 6.32  | 3.07  | 5.79   | 6.74   | 6.68   | 7.56   | 5.44   | 5.79  |
| ab        | 29.78  | 29.03 | 21.72  | 24.98  | 23.08  | 26.68  | 22.09  | 25.52 | 21.68 | 23.83  | 22.86  | 24.82  | 24.43  | 29.00  | 27.60 |
| an        | 24.14  | 21.79 | 31.58  | 21.70  | 30.63  | 17.82  | 32.27  | 22.11 | 28.73 | 21.88  | 21.20  | 19.66  | 18.39  | 22.45  | 23.47 |
| ne        | 3.16   | 3.39  | 1.39   | 4.89   | 1.02   | 8.88   | 0.00   | 4.51  | 0.68  | 5.66   | 6.27   | 7.96   | 9.27   | 3.59   | 3.43  |
| di        | 10.94  | 12.19 | 20.41  | 14.11  | 18.07  | 12.63  | 19.93  | 15.11 | 25.33 | 15.26  | 14.68  | 12.87  | 12.49  | 11.73  | 12.46 |
| hy        | 0.00   | 0.00  | 0.00   | 0.00   | 0.00   | 0.00   | 0.11   | 0.00  | 0.00  | 0.00   | 0.00   | 0.00   | 0.00   | 0.00   | 0.00  |
| ol        | 17.79  | 18.37 | 17.50  | 20.72  | 20.19  | 18.30  | 19.54  | 18.81 | 13.76 | 20.33  | 20.94  | 19.95  | 19.89  | 18.33  | 17.31 |
| nt        | 1.97   | 1.94  | 1.65   | 1.87   | 1.81   | 1.90   | 1.75   | 1.84  | 1.81  | 1.88   | 1.90   | 1.97   | 2.06   | 2.09   | 1.91  |
| il        | 5.08   | 4.66  | 3.10   | 4.54   | 3.38   | 4.92   | 3.36   | 3.65  | 3.79  | 4.73   | 4.51   | 5.23   | 5.34   | 5.60   | 4.95  |
| ap        | 1.53   | 1.96  | 0.39   | 1.23   | 0.53   | 1.56   | 0.53   | 1.20  | 0.44  | 1.28   | 1.26   | 1.40   | 1.53   | 2.36   | 2.02  |

## MADINAH-OTB-HAWAIIITE-MUGEARITE-BENMOREITE-TRACHYTE - Page 4

| Sample    | 4100  | 4260  | 4202   | 1380  | 2403  | 2410  | 4179  | 4166   | 2412  | 2440  |
|-----------|-------|-------|--------|-------|-------|-------|-------|--------|-------|-------|
| Rock Type | OTB   | HAW   | HAW    | OTB   | OTB   | HAW   | HAW   | HAW    | HAW   | HAW   |
| Harrat    | R     | T     | BA     | R     | R     | R     | BA    | BA     | R     | R     |
| Subunit   | Qm3   | Qm1   | Qm6    | Qm7   | Qm6   | Qm5   | Qm3   | Qm2    | Qm5   | Qm1   |
| SiO2      | 47.01 | 46.99 | 46.56  | 46.53 | 46.18 | 46.15 | 45.85 | 45.77  | 45.56 | 45.55 |
| TiO2      | 1.50  | 2.91  | 2.84   | 2.24  | 2.22  | 3.56  | 2.96  | 2.93   | 3.51  | 3.61  |
| Al2O3     | 15.82 | 16.40 | 15.84  | 15.90 | 15.91 | 16.21 | 15.26 | 15.40  | 15.84 | 15.87 |
| FeO       | 10.48 | 11.25 | 12.36  | 11.18 | 11.69 | 12.94 | 12.78 | 12.40  | 13.34 | 13.21 |
| MnO       | 0.17  | 0.20  | 0.18   | 0.18  | 0.18  | 0.22  | 0.18  | 0.18   | 0.23  | 0.22  |
| MgO       | 10.86 | 6.91  | 8.25   | 8.91  | 8.73  | 5.32  | 8.19  | 8.92   | 4.99  | 5.24  |
| CaO       | 11.04 | 9.65  | 8.50   | 11.66 | 11.40 | 8.90  | 8.97  | 9.04   | 9.06  | 9.02  |
| Na2O      | 2.66  | 3.91  | 4.22   | 2.77  | 2.76  | 4.09  | 4.11  | 4.11   | 4.21  | 4.16  |
| K2O       | 0.25  | 1.11  | 1.08   | 0.39  | 0.40  | 1.02  | 1.04  | 1.23   | 1.10  | 1.07  |
| P2O5      | 0.16  | 0.64  | 0.54   | 0.23  | 0.23  | 0.98  | 0.56  | 0.60   | 1.08  | 1.01  |
| Total     | 99.94 | 99.97 | 100.36 | 99.99 | 99.69 | 99.39 | 99.90 | 100.59 | 98.90 | 98.95 |
| NI        | 268   | 79    | 127    | 153   | 147   | 23    | 122   | 134    | 16    | 21    |
| CR        | 446   | 151   | 239    | 310   | 279   | 24    | 249   | 179    | 17    | 25    |
| BA        | 5     | 180   | 111    | 32    | 19    | 135   | 71    | 134    | 133   | 112   |
| RB        | 1     | 10    | 10     | 3     | 4     | 7     | 9     | 12     | 9     | 7     |
| SR        | 340   | 659   | 755    | 425   | 433   | 612   | 744   | 747    | 604   | 600   |
| IR        | 102   | 256   | 306    | 133   | 133   | 247   | 283   | 286    | 269   | 251   |
| Y         | 18    | 26    | 23     | 21    | 21    | 31    | 23    | 26     | 34    | 33    |
| NB        | 6     | 32    | 28     | 12    | 10    | 28    | 27    | 42     | 28    | 28    |
| GA        | 15    | 22    | 18     | 21    | 19    | 19    | 18    | 16     | 25    | 21    |
| CU        | 112   | 55    | 60     | 106   | 109   | 45    | 61    | 60     | 46    | 55    |
| ZN        | 73    | 82    | 87     | 83    | 80    | 105   | 94    | 91     | 109   | 108   |
| SC        | 28    | 22    | 19     | 28    | 28    | 21    | 19    | 22     | 19    | 21    |
| V         | 233   | 230   | 208    | 269   | 269   | 223   | 235   | 237    | 198   | 222   |
| LA        | 3     | 28    | 23     | 6     | 6     | 26    | 24    | 28     | 27    | 26    |
| CE        | 25    | 68    | 61     | 32    | 31    | 67    | 64    | 66     | 68    | 68    |
| AN        | 61.19 | 51.59 | 49.40  | 62.07 | 62.12 | 46.01 | 50.89 | 54.40  | 45.90 | 46.39 |
| or        | 1.48  | 6.56  | 6.38   | 2.30  | 2.36  | 6.03  | 6.15  | 7.27   | 6.50  | 6.32  |
| ab        | 19.34 | 22.45 | 21.60  | 18.21 | 18.20 | 26.83 | 19.42 | 16.71  | 24.84 | 24.81 |
| an        | 30.49 | 23.92 | 21.09  | 29.80 | 29.84 | 22.86 | 20.12 | 19.94  | 21.08 | 21.47 |
| ne        | 1.72  | 5.76  | 7.64   | 2.83  | 2.75  | 4.21  | 8.32  | 9.79   | 5.84  | 5.63  |
| di        | 18.86 | 16.20 | 14.38  | 21.65 | 20.60 | 12.37 | 16.97 | 17.12  | 14.04 | 13.88 |
| ol        | 23.28 | 16.38 | 20.78  | 18.73 | 19.40 | 16.12 | 20.09 | 20.93  | 15.46 | 15.67 |
| wt        | 1.68  | 1.81  | 1.99   | 1.80  | 1.88  | 2.09  | 2.06  | 2.00   | 2.15  | 2.13  |
| il        | 2.85  | 5.52  | 5.39   | 4.25  | 4.21  | 6.77  | 5.62  | 5.57   | 6.66  | 6.85  |
| ap        | 0.36  | 1.49  | 1.25   | 0.53  | 0.54  | 2.27  | 1.31  | 1.40   | 2.49  | 2.34  |

## MADINAH-AOB - Page 2

| Sample   | 4168   | 4172   | 4193   | 4197  | 4227   | 4163   | 4174   | 4112   | 2425   | 4231   | 4163  | 4099   | 2382   | 2436  | 4192   |
|----------|--------|--------|--------|-------|--------|--------|--------|--------|--------|--------|-------|--------|--------|-------|--------|
| RockType | AOB    | AOB    | AOB    | AOB   | AOB    | AOB    | AOB    | AOB    | AOB    | AOB    | AOB   | AOB    | AOB    | AOB   | AOB    |
| Harrat   | R      | R      | T      | T     | T      | BA     | R      | R      | R      | T      | BA    | R      | R      | R     | T      |
| Subunit  | Qm1    | Qm2    | Qm3    | Qm1   | Qm1    | Qm2    | Qm2    | Qm3    | Qm5    | Qm1    | Qm3   | Qm3    | Qmb    | Qm5   | Qm1    |
| SiO2     | 47.44  | 47.41  | 47.38  | 47.31 | 47.19  | 47.14  | 47.08  | 47.08  | 47.06  | 47.06  | 47.01 | 46.96  | 46.93  | 46.91 | 46.89  |
| TiO2     | 2.56   | 2.07   | 2.48   | 2.75  | 2.42   | 2.76   | 2.73   | 3.04   | 3.19   | 2.97   | 2.36  | 2.02   | 3.57   | 2.63  | 2.41   |
| Al2O3    | 16.02  | 16.76  | 16.07  | 16.41 | 16.21  | 16.32  | 16.40  | 16.49  | 16.42  | 16.47  | 15.60 | 16.87  | 16.38  | 16.26 | 15.41  |
| FeO      | 11.80  | 11.49  | 11.47  | 11.47 | 12.86  | 12.46  | 12.57  | 12.54  | 12.95  | 13.24  | 11.20 | 11.49  | 12.78  | 12.37 | 11.20  |
| MnO      | 0.19   | 0.18   | 0.19   | 0.16  | 0.22   | 0.19   | 0.20   | 0.19   | 0.20   | 0.21   | 0.17  | 0.18   | 0.19   | 0.22  | 0.19   |
| MgO      | 7.39   | 8.03   | 8.08   | 7.27  | 6.84   | 7.24   | 6.85   | 7.12   | 6.27   | 6.07   | 8.75  | 8.17   | 6.76   | 6.20  | 6.65   |
| CaO      | 9.53   | 10.36  | 9.44   | 9.24  | 9.51   | 9.77   | 9.35   | 9.62   | 9.10   | 8.39   | 9.56  | 10.25  | 9.01   | 9.05  | 10.74  |
| Na2O     | 3.65   | 3.16   | 3.76   | 3.72  | 3.54   | 3.59   | 3.82   | 3.55   | 3.79   | 3.96   | 3.92  | 3.22   | 3.74   | 4.09  | 3.38   |
| K2O      | 0.92   | 0.55   | 0.91   | 1.02  | 0.70   | 0.59   | 0.70   | 0.72   | 0.82   | 0.90   | 0.64  | 0.58   | 0.83   | 0.88  | 0.87   |
| P2O5     | 0.55   | 0.27   | 0.54   | 0.55  | 0.64   | 0.33   | 0.44   | 0.37   | 0.54   | 0.69   | 0.50  | 0.28   | 0.44   | 0.94  | 0.47   |
| Total    | 100.04 | 100.28 | 100.32 | 99.90 | 100.33 | 100.39 | 100.14 | 100.72 | 100.33 | 100.17 | 99.91 | 100.02 | 100.64 | 99.55 | 100.40 |
| NI       | 112    | 115    | 124    | 114   | 72     | 83     | 76     | 80     | 62     | 54     | 183   | 113    | 76     | 51    | 188    |
| CR       | 203    | 182    | 256    | 193   | 156    | 160    | 101    | 125    | 79     | 82     | 393   | 119    | 122    | 56    | 442    |
| BA       | 143    | 45     | 97     | 132   | 130    | 25     | 55     | 56     | 114    | 122    | 62    | 9      | 84     | 93    | 95     |
| RB       | 8      | 4      | 10     | 7     | 6      | 3      | 5      | 6      | 4      | 6      | 8     | 3      | 7      | 6     | 11     |
| SR       | 511    | 477    | 611    | 657   | 482    | 471    | 509    | 559    | 623    | 552    | 687   | 506    | 588    | 566   | 531    |
| ZR       | 206    | 143    | 239    | 251   | 204    | 167    | 191    | 181    | 220    | 239    | 282   | 157    | 203    | 224   | 204    |
| Y        | 24     | 20     | 27     | 27    | 31     | 23     | 24     | 24     | 28     | 33     | 22    | 22     | 24     | 32    | 26     |
| MB       | 25     | 16     | 28     | 25    | 21     | 16     | 20     | 19     | 25     | 26     | 23    | 13     | 24     | 22    | 28     |
| GA       | 20     | 22     | 20     | 20    | 20     | 22     | 18     | 17     | 16     | 18     | 15    | 21     | 18     | 20    | 19     |
| CU       | 78     | 92     | 76     | 61    | 74     | 84     | 60     | 59     | 59     | 53     | 82    | 75     | 51     | 51    | 95     |
| ZN       | 68     | 62     | 79     | 80    | 92     | 90     | 85     | 78     | 88     | 85     | 94    | 92     | 84     | 96    | 73     |
| SC       | 25     | 25     | 25     | 21    | 24     | 25     | 24     | 24     | 22     | 20     | 21    | 24     | 23     | 22    | 26     |
| V        | 228    | 242    | 226    | 216   | 206    | 260    | 243    | 276    | 239    | 197    | 204   | 233    | 281    | 195   | 236    |
| LA       | 17     | 9      | 23     | 23    | 20     | 11     | 16     | 14     | 21     | 24     | 20    | 11     | 18     | 23    | 18     |
| CE       | 49     | 36     | 58     | 60    | 57     | 41     | 46     | 45     | 52     | 64     | 57    | 37     | 48     | 63    | 53     |
| AN       | 50.17  | 56.61  | 50.95  | 50.49 | 49.17  | 52.25  | 50.40  | 52.55  | 48.84  | 45.43  | 51.33 | 58.01  | 49.54  | 46.36 | 57.11  |
| or       | 5.44   | 3.25   | 5.38   | 6.03  | 4.14   | 3.49   | 4.14   | 4.26   | 4.65   | 5.32   | 4.96  | 3.43   | 4.91   | 5.20  | 5.14   |
| ab       | 24.44  | 22.94  | 23.38  | 24.58 | 27.16  | 24.38  | 25.13  | 24.32  | 26.58  | 29.44  | 21.33 | 21.62  | 25.94  | 27.09 | 18.26  |
| an       | 24.61  | 29.92  | 24.29  | 25.07 | 26.28  | 26.68  | 25.54  | 26.94  | 25.37  | 24.51  | 22.49 | 29.87  | 25.46  | 23.41 | 24.31  |
| ne       | 3.49   | 2.06   | 4.57   | 3.74  | 1.52   | 3.25   | 3.90   | 3.10   | 2.97   | 2.20   | 6.42  | 3.05   | 3.09   | 4.07  | 5.60   |
| di       | 15.69  | 16.13  | 15.55  | 14.10 | 12.76  | 16.15  | 14.82  | 15.13  | 13.46  | 9.35   | 17.67 | 15.67  | 13.47  | 12.69 | 21.10  |
| ol       | 18.48  | 19.69  | 19.48  | 18.18 | 20.02  | 18.57  | 18.52  | 18.48  | 17.66  | 19.65  | 19.72 | 20.17  | 18.05  | 18.05 | 18.65  |
| wt       | 1.90   | 1.86   | 1.84   | 1.84  | 2.07   | 2.02   | 2.03   | 2.02   | 2.09   | 2.13   | 1.80  | 1.86   | 2.06   | 2.00  | 1.80   |
| il       | 4.86   | 3.94   | 4.71   | 5.22  | 4.60   | 5.24   | 5.18   | 5.78   | 6.05   | 5.64   | 4.49  | 3.83   | 6.79   | 5.00  | 4.57   |
| ap       | 1.26   | 0.63   | 1.26   | 1.27  | 1.94   | 0.77   | 1.02   | 0.85   | 1.24   | 2.07   | 1.16  | 0.66   | 1.02   | 2.18  | 1.09   |

## MADINAH-AOB - Page 3

| SAMPLE   | 2423   | 4210  | 2427  | 4198  | 4169   | 2422  | 4167   | 2424  | 4195   | 4230  | 4196  | 4173  | 4177  | 2400  | 2402  |
|----------|--------|-------|-------|-------|--------|-------|--------|-------|--------|-------|-------|-------|-------|-------|-------|
| RockType | AOB    | AOB   | AOB   | AOB   | AOB    | AOB   | AOB    | AOB   | AOB    | AOB   | AOB   | AOB   | AOB   | AOB   | AOB   |
| Harrat   | R      | T     | R     | BA    | R      | R     | R      | R     | T      | T     | T     | R     | BA    | R     | R     |
| Subunit  | Qm1    | Qm1   | Qm1   | Qm2   | Qm3    | Qm3   | Qm3    | Qm5   | Qm1    | Qm1   | Qm5   | Qm3   | Qm3   | Qmb   | Qmb   |
| SiO2     | 46.82  | 46.80 | 46.78 | 46.78 | 46.59  | 46.55 | 46.53  | 46.49 | 46.39  | 46.24 | 46.23 | 46.21 | 46.20 | 45.87 | 45.86 |
| TiO2     | 2.69   | 2.78  | 2.47  | 2.25  | 2.98   | 2.73  | 2.96   | 3.20  | 2.73   | 2.56  | 2.54  | 2.93  | 2.74  | 3.55  | 3.43  |
| Al2O3    | 16.16  | 15.97 | 16.46 | 15.27 | 16.53  | 16.21 | 16.41  | 16.31 | 15.68  | 16.34 | 14.94 | 16.33 | 16.27 | 16.11 | 15.89 |
| FeO      | 12.48  | 11.91 | 12.28 | 11.48 | 12.52  | 12.56 | 12.49  | 13.13 | 11.49  | 12.23 | 10.82 | 12.64 | 12.57 | 12.31 | 12.32 |
| MnO      | 0.20   | 0.19  | 0.19  | 0.18  | 0.20   | 0.20  | 0.20   | 0.20  | 0.19   | 0.19  | 0.18  | 0.20  | 0.20  | 0.19  | 0.19  |
| MgO      | 6.95   | 8.00  | 6.86  | 8.96  | 6.64   | 6.80  | 6.67   | 6.24  | 8.72   | 6.95  | 9.58  | 6.67  | 6.71  | 6.89  | 7.22  |
| CaO      | 9.82   | 9.31  | 10.31 | 9.64  | 9.63   | 9.85  | 9.72   | 9.00  | 9.83   | 10.65 | 10.03 | 9.48  | 10.15 | 9.52  | 9.65  |
| Na2O     | 3.67   | 3.64  | 3.36  | 3.55  | 3.67   | 3.48  | 3.57   | 3.88  | 3.68   | 3.50  | 3.47  | 3.71  | 3.63  | 3.44  | 3.50  |
| K2O      | 0.72   | 0.70  | 0.56  | 0.80  | 0.86   | 0.68  | 0.85   | 0.88  | 1.07   | 0.55  | 1.06  | 0.85  | 0.67  | 0.77  | 0.78  |
| P2O5     | 0.53   | 0.37  | 0.54  | 0.51  | 0.79   | 0.63  | 0.80   | 0.56  | 0.54   | 0.34  | 0.51  | 0.78  | 0.70  | 0.39  | 0.39  |
| Total    | 100.04 | 99.67 | 99.82 | 99.42 | 100.42 | 99.69 | 100.21 | 99.89 | 100.32 | 99.55 | 99.36 | 99.81 | 99.84 | 99.03 | 99.42 |
| NI       | 74     | 140   | 75    | 156   | 60     | 67    | 59     | 58    | 131    | 89    | 171   | 59    | 67    | 82    | 100   |
| CR       | 108    | 166   | 118   | 402   | 98     | 122   | 65     | 74    | 285    | 147   | 448   | 59    | 96    | 118   | 154   |
| BA       | 64     | 73    | 105   | 103   | 94     | 188   | 117    | 118   | 148    | 58    | 144   | 124   | 46    | 63    | 79    |
| RB       | 5      | 6     | 5     | 9     | 6      | 5     | 6      | 8     | 12     | 5     | 14    | 6     | 5     | 7     | 6     |
| SR       | 490    | 514   | 584   | 628   | 567    | 480   | 573    | 570   | 626    | 478   | 683   | 598   | 583   | 597   | 659   |
| ZR       | 184    | 179   | 167   | 248   | 204    | 177   | 202    | 216   | 223    | 160   | 211   | 201   | 176   | 199   | 197   |
| Y        | 28     | 24    | 25    | 25    | 30     | 27    | 29     | 27    | 26     | 23    | 24    | 28    | 27    | 23    | 22    |
| NB       | 17     | 19    | 18    | 29    | 22     | 21    | 22     | 23    | 34     | 16    | 36    | 22    | 17    | 21    | 22    |
| GA       | 18     | 18    | 17    | 16    | 22     | 19    | 22     | 22    | 17     | 19    | 16    | 20    | 19    | 19    | 22    |
| CU       | 70     | 71    | 75    | 69    | 57     | 66    | 58     | 50    | 75     | 72    | 76    | 60    | 66    | 54    | 50    |
| ZN       | 92     | 81    | 88    | 83    | 91     | 90    | 93     | 86    | 77     | 77    | 71    | 93    | 91    | 86    | 85    |
| SC       | 24     | 24    | 24    | 23    | 24     | 23    | 24     | 21    | 24     | 23    | 24    | 23    | 23    | 22    | 22    |
| Y        | 232    | 250   | 249   | 210   | 249    | 228   | 246    | 235   | 241    | 231   | 235   | 237   | 238   | 289   | 277   |
| LA       | 14     | 16    | 14    | 19    | 19     | 15    | 20     | 19    | 24     | 11    | 24    | 17    | 17    | 17    | 16    |
| CE       | 46     | 46    | 43    | 54    | 55     | 46    | 55     | 51    | 60     | 42    | 58    | 54    | 50    | 47    | 46    |
| AN       | 51.84  | 51.32 | 53.96 | 51.96 | 51.73  | 52.05 | 51.74  | 49.44 | 55.87  | 57.14 | 56.08 | 51.42 | 53.47 | 52.96 | 54.27 |
| or       | 4.26   | 4.14  | 3.31  | 4.73  | 5.08   | 4.02  | 5.02   | 5.20  | 6.32   | 3.25  | 6.26  | 5.02  | 3.96  | 4.55  | 4.61  |
| ab       | 23.68  | 23.87 | 24.04 | 21.60 | 24.35  | 24.51 | 24.48  | 25.04 | 18.25  | 20.44 | 17.27 | 23.99 | 22.73 | 23.31 | 21.36 |
| an       | 25.50  | 25.17 | 28.18 | 23.37 | 26.09  | 26.60 | 26.24  | 24.49 | 23.11  | 27.25 | 22.06 | 25.40 | 26.12 | 26.24 | 25.35 |
| ne       | 3.99   | 3.75  | 2.38  | 4.57  | 3.63   | 2.68  | 3.10   | 4.22  | 6.98   | 4.97  | 6.55  | 4.01  | 4.33  | 3.14  | 4.47  |
| di       | 16.26  | 15.20 | 16.04 | 17.26 | 13.62  | 15.00 | 13.79  | 13.65 | 18.07  | 19.23 | 19.78 | 13.63 | 16.25 | 15.15 | 17.23 |
| ol       | 18.14  | 19.61 | 18.08 | 20.71 | 18.37  | 18.36 | 18.20  | 17.94 | 19.43  | 16.92 | 19.80 | 18.48 | 17.74 | 17.16 | 17.15 |
| st       | 2.02   | 1.91  | 1.97  | 1.86  | 2.02   | 2.03  | 2.02   | 2.12  | 1.86   | 1.97  | 1.74  | 2.04  | 2.03  | 1.99  | 1.99  |
| il       | 5.10   | 5.27  | 4.70  | 4.28  | 5.66   | 5.19  | 5.63   | 6.08  | 5.19   | 4.85  | 4.83  | 5.57  | 5.21  | 6.73  | 6.52  |
| ep       | 1.24   | 0.87  | 1.25  | 1.17  | 1.84   | 1.45  | 1.86   | 1.30  | 1.24   | 0.79  | 1.18  | 1.81  | 1.61  | 0.90  | 0.89  |

## MADINAH-AOB - Page 4

| Sample    | 4158  | 2386  | 2449  |
|-----------|-------|-------|-------|
| Rock Type | AOB   | AOB   | AOB   |
| Harrat    | BA    | R     | R     |
| Subunit   | Qm6   | Qm7   | Qm2   |
| SiO2      | 45.83 | 45.82 | 45.68 |
| TiO2      | 2.72  | 2.65  | 2.61  |
| Al2O3     | 15.45 | 15.33 | 15.87 |
| FeO       | 11.75 | 11.44 | 12.21 |
| MnO       | 0.18  | 0.18  | 0.20  |
| MgO       | 9.04  | 9.29  | 6.81  |
| CaO       | 9.27  | 10.79 | 11.16 |
| Na2O      | 3.92  | 3.04  | 3.13  |
| K2O       | 0.93  | 0.57  | 0.55  |
| P2O5      | 0.46  | 0.29  | 0.59  |
| Total     | 99.54 | 99.40 | 98.81 |
| NI        | 155   | 190   | 70    |
| CR        | 289   | 407   | 136   |
| BA        | 82    | 53    | 94    |
| RB        | 7     | 5     | 4     |
| SR        | 642   | 457   | 442   |
| ZR        | 266   | 161   | 170   |
| Y         | 23    | 21    | 27    |
| NB        | 43    | 13    | 18    |
| GA        | 6     | 16    | 18    |
| CU        | 60    | 83    | 64    |
| ZN        | 85    | 82    | 91    |
| SC        | 21    | 26    | 26    |
| V         | 232   | 259   | 227   |
| LA        | 20    | 11    | 14    |
| CE        | 55    | 35    | 45    |
| AN        | 54.30 | 60.05 | 57.62 |
| or        | 5.50  | 3.37  | 3.26  |
| ab        | 18.36 | 17.63 | 20.32 |
| an        | 21.82 | 26.50 | 27.63 |
| ne        | 8.02  | 4.38  | 3.34  |
| di        | 17.28 | 20.46 | 19.68 |
| ol        | 20.58 | 19.64 | 16.44 |
| mt        | 1.90  | 1.84  | 1.97  |
| il        | 5.16  | 5.04  | 4.95  |
| ap        | 1.06  | 0.67  | 1.37  |

APPENDIX B: Rare earth element data for Harrat Rahat lavas

| Sample No. | 4147    | 4210    | 4232    | 4261   | 4149     | 4204     | 4270     | 4226     |
|------------|---------|---------|---------|--------|----------|----------|----------|----------|
| Rock type  | Trach.  | AOB     | Ben.    | Mug.   | OTB      | OTB      | OTB      | OTB      |
| Basalt     | Madinah | Madinah | Madinah | Hammah | Shawahit | Shawahit | Shawahit | Shawahit |
| Subunit    | Qm 4    | Qm 1    | Qm 1    | -      | Upper    | Upper    | Upper    | Lower    |
| La ppm     | 102.50  | 15.96   | 66.90   | 52.60  | 10.96    | 10.68    | 7.53     | 6.72     |
| Ce ppm     | 243.00  | 38.76   | 158.10  | 124.60 | 27.32    | 24.69    | 19.00    | 16.48    |
| Pr ppm     | 23.80   | 4.51    | 16.60   | 13.10  | 3.22     | 2.30     | 2.18     | 1.84     |
| Nd ppm     | 92.60   | 21.06   | 66.20   | 57.60  | 15.12    | 13.11    | 11.20    | 9.53     |
| Sm ppm     | 18.30   | 4.84    | 12.78   | 11.10  | 3.83     | 3.30     | 3.07     | 2.55     |
| Eu ppm     | 2.50    | 1.81    | 3.79    | 3.71   | 1.42     | 1.21     | 1.16     | .96      |
| Gd ppm     | 16.70   | 4.83    | 11.39   | 9.98   | 4.03     | 3.49     | 3.43     | 2.91     |
| Dy ppm     | 16.75   | 4.38    | 10.13   | 7.74   | 3.55     | 3.30     | 3.55     | 3.22     |
| Ho ppm     | 3.45    | .88     | 2.06    | 1.56   | .71      | .74      | .76      | .71      |
| Er ppm     | 10.56   | 2.41    | 6.11    | 4.18   | 2.20     | 1.96     | 2.23     | 2.11     |
| Yb ppm     | 10.80   | 1.97    | 6.19    | 3.49   | 1.71     | 1.70     | 1.98     | 1.88     |
| Lu ppm     | 1.68    | .31     | 1.02    | .55    | .26      | .27      | .31      | .29      |
| La (C.N.)  | 310.6   | 48.3    | 202.7   | 159.3  | 33.2     | 32.3     | 22.8     | 20.3     |
| Ce (C.N.)  | 280.9   | 44.8    | 182.7   | 144.0  | 31.5     | 28.5     | 21.9     | 19.0     |
| Pr (C.N.)  | 195.0   | 36.9    | 136.0   | 107.3  | 26.3     | 18.8     | 17.8     | 15.0     |
| Nd (C.N.)  | 146.9   | 33.4    | 105.0   | 91.4   | 24.0     | 20.8     | 17.7     | 15.1     |
| Sm (C.N.)  | 90.1    | 23.8    | 62.9    | 54.6   | 18.8     | 16.2     | 15.1     | 12.5     |
| Eu (C.N.)  | 32.4    | 23.5    | 49.2    | 48.1   | 18.4     | 15.7     | 15.0     | 12.4     |
| Gd (C.N.)  | 60.7    | 17.5    | 41.4    | 36.2   | 14.6     | 12.6     | 12.4     | 10.5     |
| Dy (C.N.)  | 48.9    | 12.8    | 29.6    | 22.6   | 10.3     | 9.6      | 10.3     | 9.4      |
| Ho (C.N.)  | 45.3    | 11.5    | 27.1    | 20.5   | 9.3      | 9.7      | 10.0     | 9.3      |
| Er (C.N.)  | 46.9    | 10.7    | 27.1    | 18.5   | 9.7      | 8.7      | 9.9      | 9.3      |
| Yb (C.N.)  | 49.0    | 8.9     | 28.1    | 15.8   | 7.7      | 7.7      | 9.0      | 8.5      |
| Lu (C.N.)  | 49.4    | 9.1     | 30.0    | 16.1   | 7.6      | 7.9      | 9.1      | 8.5      |

Note: Data are shown in measured ppm as well as chondrite normalized ppm (C.N.) against the values of Nakamura (1974). Data were determined by INAA; precision should be 5-10% unless working close to detection limits (N.Walsh, written communication).

MADINAH-AOB - Page 1  
(48 samples)

| Sample    | 2426   | 2407   | 2448  | 4178   | 4165   | 2443   | 4088   | 4085   | 2397   | 4113   | 2429  | 4089   | 2413  | 2408  | 4056   |
|-----------|--------|--------|-------|--------|--------|--------|--------|--------|--------|--------|-------|--------|-------|-------|--------|
| Rock Type | AOB    | AOB    | AOB   | AOB    | AOB    | AOB    | AOB    | AOB    | AOB    | AOB    | AOB   | AOB    | AOB   | AOB   | AOB    |
| Harriet   | R      | R      | R     | BA     | BA     | R      | R      | R      | R      | R      | R     | R      | R     | R     | R      |
| Subunit   | Qm2    | Qm7    | Qm2   | Qm1    | Qm1    | Qm1    | Qm3    | Qm7    | Qm2    | Qm3    | Qm1   | Qm7    | Qm5   | Qm1   | Qm2    |
| SiO2      | 49.40  | 48.84  | 48.55 | 48.41  | 48.23  | 48.20  | 48.12  | 47.88  | 47.85  | 47.79  | 47.78 | 47.77  | 47.58 | 47.53 | 47.51  |
| TiO2      | 1.98   | 2.35   | 1.92  | 2.29   | 2.43   | 2.49   | 2.32   | 2.77   | 2.60   | 2.61   | 2.11  | 2.09   | 2.64  | 1.97  | 2.77   |
| Al2O3     | 16.45  | 16.51  | 16.04 | 16.38  | 16.68  | 16.13  | 16.49  | 16.40  | 16.27  | 17.14  | 16.23 | 16.73  | 15.83 | 16.74 | 16.80  |
| FeO       | 10.98  | 11.38  | 11.48 | 12.70  | 10.42  | 12.03  | 11.82  | 12.77  | 12.99  | 11.91  | 11.73 | 11.23  | 11.64 | 11.16 | 12.08  |
| MnO       | 0.19   | 0.21   | 0.19  | 0.21   | 0.17   | 0.20   | 0.20   | 0.21   | 0.20   | 0.20   | 0.19  | 0.18   | 0.19  | 0.18  | 0.19   |
| MgO       | 7.30   | 6.88   | 7.64  | 6.23   | 7.06   | 7.16   | 6.97   | 6.77   | 6.54   | 6.48   | 7.51  | 8.96   | 7.97  | 7.67  | 6.47   |
| CaO       | 8.79   | 8.66   | 9.08  | 8.80   | 10.44  | 9.07   | 8.84   | 9.09   | 8.88   | 9.29   | 9.08  | 10.82  | 9.37  | 10.50 | 9.42   |
| Na2O      | 3.91   | 3.90   | 3.79  | 3.93   | 3.77   | 3.88   | 4.00   | 3.96   | 3.80   | 3.68   | 3.77  | 3.16   | 3.55  | 3.18  | 3.84   |
| K2O       | 0.96   | 1.06   | 0.83  | 0.94   | 1.10   | 0.82   | 0.93   | 0.84   | 0.78   | 0.81   | 0.87  | 0.43   | 0.74  | 0.48  | 0.92   |
| P2O5      | 0.48   | 0.71   | 0.46  | 0.52   | 0.41   | 0.43   | 0.54   | 0.82   | 0.58   | 0.53   | 0.47  | 0.29   | 0.45  | 0.24  | 0.58   |
| Total     | 100.44 | 100.49 | 99.97 | 100.41 | 100.70 | 100.41 | 100.23 | 101.51 | 100.49 | 100.43 | 99.75 | 101.66 | 99.96 | 99.85 | 100.58 |
| NI        | 130    | 115    | 146   | 72     | 90     | 104    | 116    | 74     | 89     | 47     | 130   | 150    | 140   | 103   | 63     |
| CR        | 315    | 161    | 344   | 112    | 145    | 199    | 152    | 120    | 145    | 29     | 243   | 250    | 233   | 164   | 117    |
| BA        | 106    | 183    | 94    | 140    | 176    | 74     | 101    | 98     | 223    | 61     | 77    | 4      | 101   | 35    | 87     |
| RB        | 10     | 9      | 8     | 8      | 12     | 7      | 5      | 8      | 5      | 7      | 9     | 4      | 6     | 4     | 8      |
| SR        | 435    | 530    | 443   | 472    | 642    | 457    | 513    | 580    | 478    | 567    | 449   | 449    | 466   | 368   | 526    |
| ZR        | 239    | 245    | 232   | 232    | 208    | 180    | 217    | 223    | 205    | 204    | 212   | 150    | 182   | 129   | 191    |
| Y         | 26     | 29     | 27    | 30     | 21     | 27     | 27     | 30     | 30     | 26     | 26    | 22     | 24    | 22    | 26     |
| NB        | 27     | 30     | 26    | 21     | 29     | 20     | 23     | 20     | 24     | 20     | 26    | 10     | 21    | 11    | 25     |
| GA        | 16     | 20     | 21    | 23     | 19     | 18     | 18     | 21     | 19     | 19     | 20    | 19     | 20    | 18    | 18     |
| CU        | 83     | 63     | 81    | 63     | 93     | 65     | 61     | 63     | 28     | 54     | 85    | 107    | 68    | 85    | 62     |
| ZN        | 90     | 93     | 87    | 95     | 90     | 88     | 86     | 97     | 88     | 88     | 88    | 82     | 88    | 84    | 89     |
| SC        | 21     | 18     | 22    | 23     | 25     | 23     | 20     | 24     | 21     | 23     | 22    | 29     | 23    | 27    | 23     |
| V         | 173    | 164    | 187   | 198    | 234    | 210    | 183    | 218    | 303    | 230    | 258   | 261    | 230   | 243   | 258    |
| LA        | 21     | 25     | 20    | 22     | 16     | 17     | 19     | 24     | 18     | 17     | 19    | 12     | 16    | 8     | 17     |
| CE        | 50     | 59     | 52    | 56     | 48     | 48     | 55     | 76     | 46     | 51     | 49    | 50     | 46    | 31    | 51     |
| AN        | 45.02  | 44.77  | 46.84 | 45.83  | 53.91  | 46.98  | 47.08  | 46.66  | 46.62  | 50.39  | 48.95 | 59.10  | 49.19 | 56.09 | 50.39  |
| cr        | 5.67   | 6.26   | 4.91  | 5.56   | 6.50   | 4.85   | 5.50   | 4.96   | 4.61   | 4.79   | 5.14  | 2.54   | 4.37  | 2.84  | 5.44   |
| ab        | 29.92  | 30.11  | 27.58 | 28.69  | 21.67  | 27.28  | 27.31  | 28.00  | 28.67  | 27.43  | 25.86 | 20.90  | 25.90 | 23.47 | 25.49  |
| an        | 24.50  | 24.41  | 24.31 | 24.28  | 25.34  | 24.18  | 24.29  | 24.49  | 25.04  | 27.86  | 24.80 | 30.20  | 25.08 | 29.99 | 25.69  |
| ne        | 1.72   | 1.56   | 2.43  | 2.47   | 5.54   | 3.01   | 3.54   | 2.98   | 1.89   | 2.01   | 3.27  | 3.16   | 2.24  | 1.86  | 3.79   |
| di        | 13.10  | 11.42  | 14.59 | 13.24  | 19.48  | 14.81  | 13.19  | 12.59  | 12.63  | 12.18  | 14.10 | 17.68  | 15.14 | 16.81 | 14.06  |
| ol        | 19.02  | 18.91  | 19.75 | 18.71  | 15.06  | 18.77  | 18.98  | 19.40  | 19.44  | 18.20  | 19.63 | 21.87  | 19.45 | 18.90 | 17.50  |
| mt        | 1.77   | 1.83   | 1.86  | 2.04   | 1.68   | 1.94   | 1.90   | 2.06   | 2.09   | 1.91   | 1.88  | 1.81   | 1.87  | 1.80  | 1.94   |
| il        | 3.75   | 4.46   | 3.64  | 4.36   | 4.61   | 4.72   | 4.40   | 5.25   | 4.94   | 4.95   | 4.02  | 3.96   | 5.01  | 3.74  | 5.25   |
| ap        | 1.12   | 1.65   | 1.06  | 1.21   | 0.94   | 1.00   | 1.26   | 1.90   | 1.33   | 1.23   | 1.10  | 0.67   | 1.03  | 0.56  | 1.35   |
